20 many dinoflagellates are capable of forming Harmful Algal Blooms (HABs) toxic to humans and  
21 other animal species, the salutary effect of eelgrass habitat on neighboring waters has important  
22 implications for public health as well as shellfish aquaculture and harvesting.

## 23 **Introduction**

24 Seagrass species throughout the world's oceans are ecosystem engineers (Jones, Lawton &  
25 Shachak, 1994), generating and sustaining habitat for a multitude of associated taxa (Duffy,  
26 2006). Additionally, these marine macrophytes provide a wide variety of essential ecosystem  
27 services that directly benefit humans, such as temporary carbon sequestration (Fourqurean et al.,  
28 2012), nursery habitat for human food species (Heck Jr, Hays & Orth, 2003), and coastal  
29 protection through sediment accretion and stabilization (Potouroglou et al., 2017; reviewed in  
30 Nordlund et al., 2016). Some benefits, such as reduced exposure to pathogens, have been shown  
31 to accrue to organisms and ecosystems even outside of seagrass habitat boundaries (e.g. Lamb et  
32 al., 2017).

33 Eelgrass (*Zostera marina*) is the dominant seagrass along temperate coasts of the Northern  
34 hemisphere (Short et al., 2007). Recent worldwide declines in this species and other seagrass  
35 taxa are alarming (Orth et al., 2006; but see Shelton et al., 2017), and have been met with local  
36 protection measures in some cases, such as designation of seagrass as a 'Habitat Area of  
37 Particular Concern' (see NOAA Fisheries), as well as a Puget Sound 'Vital Sign' indicator  
38 species (Puget Sound Partnership) and the target of 'no net loss' policies (NOAA Fisheries,  
39 2014). Frequently, a tradeoff between eelgrass conservation and aquaculture is presumed when  
40 such conservation efforts compete with shellfish seeding grounds (Hosack et al., 2006).  
41 However, commercially important species such as oysters are in fact often proximally associated

42 with *Z. marina* beds in the wild; they may thus depend on services provided by the habitat, and  
43 vice versa (for example, see Groner et al., 2018).

44 To examine how *Z. marina* modifies the biological community existing both within and  
45 immediately surrounding the habitat itself, we use environmental DNA (eDNA) from water  
46 samples to survey the presence and relative abundance of organisms on a series of alongshore  
47 transects in the coastal or estuarine waters of Washington State. Each transect extends from  
48 within eelgrass beds to bare substrate and was sampled at three timepoints during the late spring  
49 and summer. By a large margin, we find that dinoflagellates are the group most affected by *Z.*  
50 *marina*; spatial proximity to eelgrass habitat is associated with a taxonomically widespread  
51 decrease in dinoflagellate abundance for meters outside the borders of the beds. These results  
52 extend previous evidence for an allelopathy of *Z. marina* (and/or associated taxa) towards  
53 particular harmful algal bloom (HAB) species that cause paralytic or diarrhetic shellfish  
54 poisoning (e.g. Inaba et al., 2017), by demonstrating an effect of eelgrass communities on  
55 dinoflagellates in a ‘halo’ of influence surrounding the habitat. In the region of study, toxigenic  
56 dinoflagellate distributions have expanded over time, and are associated with an increase in the  
57 number of shellfish harvesting closures (Trainer et al., 2003; Moore et al., 2009). Far-reaching  
58 effects of eelgrass communities on HAB-producing taxa could therefore strengthen connections  
59 between seagrass habitat and human health, particularly in native communities with elevated  
60 rates of shellfish consumption (Washington State Department of Ecology, 2013). Thus, our  
61 findings may carry potentially critical ramifications for management of both seagrass and  
62 shellfish in the many regions of the world where the two coincide.

## 63 **Methods**

### 64 **Environmental DNA sample collection**

65 Environmental DNA sequenced with a single genetic locus provides an assay of community  
66 composition consisting of many taxa. The design of the particular PCR primers used largely  
67 determines the taxonomic composition, but it is not uncommon to sequence hundreds of taxa  
68 from dozens of phyla in a given sampling effort. Here, we targeted a ca. 313 bp fragment of COI  
69 using a primer set (Leray et al., 2013) known to amplify a broad range of marine taxa including  
70 diatoms, dinoflagellates, metazoans, fungi, and others; this primer set is broadly used in  
71 ecological applications (e.g. Leray & Knowlton, 2015; Gibson et al., 2014).

72 To determine the biological community composition within *Z. marina* beds and the surrounding  
73 habitat from eDNA, we sampled seawater from five sites in Puget Sound: Port Gamble, Case  
74 Inlet, Nisqually Reach, Skokomish, and Willapa Bay (Figure 1). We surveyed each location at  
75 three timepoints during the summer season, in May, July, and August of 2017. Specifically, we  
76 collected a 1 liter bottle of seawater immediately under the water surface from the approximate  
77 center of the beds (“eelgrass”), from each point in a transect extending alongshore at 1, 3, 6, 10,  
78 and 15m from the edge of the beds, and from a final location from which seagrass was absent  
79 (“bare”) between 16 and 670m from the beds (the edge of each bed was defined as the point at  
80 which shoot density fell below 3 shoots/m<sup>2</sup>; see Table S1 for precise transect locations by site).  
81 Due to local geography and conditions, it was not always possible to gather all transect samples  
82 during each sampling event; a comprehensive list of samples gathered is given in Table S1. We  
83 kept samples on ice until processing by filtering 500mL from each sample under vacuum  
84 pressure through a cellulose acetate filter with 47 mm diameter and 0.45 um pore size and stored

85 the filter at room temperature in Longmire's buffer (Renshaw et al., 2015). The final dataset  
86 consisted of 84 water samples.

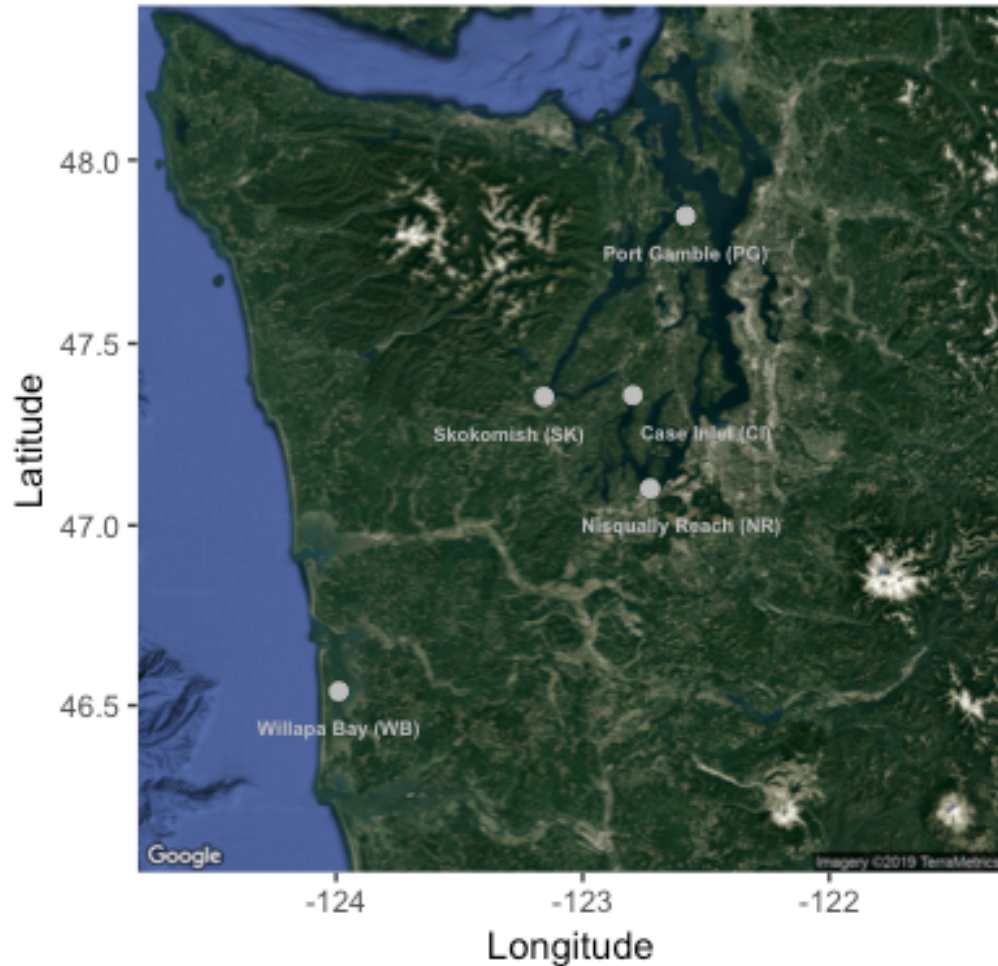

87

88 *Figure 1: Nearshore sampling locations in Puget Sound and outer coast, Washington, USA. GPS*  
89 *coordinates are given in Supplemental Table 1.*

## 90 **Extraction and amplification**

91 To extract DNA from the sample filters, we used a phenol:chloroform:isoamyl alcohol protocol  
92 (Renshaw et al., 2015), resuspended the eluate in 200 uL water, and used 1 uL of diluted DNA  
93 extract (between 1:10 and 1:400) as template for PCR. To survey the eukaryotic organisms

94 present in our samples, PCR reactions from each of the 84 biological samples were run and  
95 sequenced in triplicate to distinguish technical from biological variance. To sequence many  
96 samples and their replicates in a single run while avoiding amplification bias due to index  
97 sequence, we followed a two-step PCR protocol (O'Donnell et al., 2016). In the first step, we  
98 used a PCR reaction containing 1X HotStar Buffer, 2.5 mM MgCl<sub>2</sub>, 0.5 mM dNTP, 0.3 μM of  
99 each primer and 0.5 units of HotStar Taq (Qiagen Corp., Valencia, CA, USA) per 20 μL  
100 reaction. The PCR protocol for this step consisted of 40 cycles, including an annealing  
101 touchdown from 62 °C to 46 °C (-1 °C per cycle), followed by 25 cycles at 46 °C. In the second  
102 step, we used a similar PCR reaction, but substituted primers with extra 5' 6-base pair tags to  
103 index samples, and a similar but shorter protocol with only 10 cycles at 46 °C. Finally, we  
104 generated amplicons with the same replication scheme for both positive (kangaroo (genus  
105 *Macropus*) or ostrich (genus *Struthio*) tissue, selected because these species are absent from the  
106 sampling sites, and thus we could identify cross-contamination using reads from these taxa) and  
107 negative controls (molecular grade water), and verified by gel electrophoresis that negative  
108 controls contained no appreciable amount of DNA.

## 109 Sequencing

110 To prepare libraries of replicated, indexed samples and positive controls, we followed  
111 manufacturers' protocols (KAPA Biosystems, Wilmington, MA, USA; NEXTflex DNA  
112 barcodes; BIOO Scientific, Austin, TX, USA). We then performed sequencing on an Illumina  
113 MiSeq (250-300 bp, paired-end) platform in four different sets of samples: two MiSeq V.2 runs  
114 and two MiSeq V.3 runs. We processed each batch separately through the initial bioinformatics  
115 analysis (see below). We employed hierarchical clustering on transects containing six PCR

116 replicates sequenced across two different runs (three technical replicates per run derived from the  
117 same sampled bottle of water) and found that these samples were each others' nearest neighbors  
118 (Figure S1)); thus sequencing-run-level effects were negligible and we combined the data from  
119 the four sequencing runs.

## 120 **Bioinformatics**

121 We followed updated versions of previously published procedures for bioinformatics, quality-  
122 control, and decontamination (Kelly, Gallego & Jacobs-Palmer, 2018). This protocol uses a  
123 custom Unix-based script (Gallego) calling third-party programs to perform initial Quality  
124 Control (QC) on sequence reads from all four runs combined, demultiplexing sequences to their  
125 sample of origin and clustering of unique variants into Sequence Variants (ASVs) (Martin, 2011;  
126 Callahan et al., 2016). The output is a dataset including counts of each ASV per PCR replicate;  
127 ~28M sequence reads from 19370 ASVs emerged from this step. To address possible cross-  
128 sample contamination (see Schnell, Bohmann & Gilbert, 2015), we subtracted the maximum  
129 proportional representation of each ASV across all control samples (sequenced from extraction  
130 of kangaroo or ostrich tissue) from the respective ASV in field samples; 27M reads from 19320  
131 ASVs passed this step. After removing the two PCR replicates with an extremely low number of  
132 reads, we estimated the probability of ASV occurrence by performing site-occupancy modeling  
133 using multiple PCR replicates from each environmental sample as independent draws from a  
134 common binomial distribution, and discarded ASVs with <0.8 estimated probability; 25M reads  
135 from 3143 ASVs survived this step (Royle & Link, 2006; Lahoz-Monfort, Guillera-Arroita &  
136 Tingley, 2015). Lastly, we removed samples whose PCR replicates were highly dissimilar: we  
137 calculated the Bray-Curtis dissimilarity amongst PCR replicates from the same bottle of water



138 and discarded those with distance to the sample centroid outside a 95% Confidence Interval. Of  
139 84 bottles of water collected, 3 technical replicates survived QC in 72 cases (86%), 2 replicates  
140 in 9 cases (11%), 1 replicate in 2 cases (2%), and zero replicates in a single case (1%) (Table  
141 S1). The final dataset of 24M reads from 3142 ASVs comprised 83% of the original sequence  
142 reads.

143 All bioinformatic and analytical code is included in this manuscript, and provides the details of  
144 parameter settings in the bioinformatics pipelines used. Sequence and annotation information are  
145 included as well, and the former are deposited and publicly available in GenBank (upon  
146 acceptance).

## 147 **Taxonomy**

148 To assign taxonomy to each ASV sequence, we followed the protocol detailed in Kelly, Gallego  
149 & Jacobs-Palmer (2018). Briefly, this protocol uses blastn (Camacho et al., 2009) on a local  
150 version of the full NCBI nucleotide database (current as of February 13, 2019), recovering up to  
151 100 hits per query sequence with at least 85% similarity and maximum e-values of  $10^{-30}$   
152 (culling limit = 5), and reconciling conflicts among matches using the last common ancestor  
153 approach implemented in MEGAN 6.4 (Huson et al., 2016). Within MEGAN, we imposed an  
154 additional more stringent round of quality-control to ensure sufficient similarity between query  
155 and database sequences by requiring a bit score of at least 450 (ca. 90% identical over the entire  
156 313bp fragment). Of the 24M total reads in our dataset, we were able to annotate 4.1m to the  
157 level of phylum or lower; the majority of the remaining reads had no BLAST hits meeting our  
158 criteria (7.6M) or else did not receive taxonomic assignment due to insufficient similarity or



159 conflicting BLAST hits (12.1M). We use the annotated sequences in our taxonomic analyses  
160 below .

161 Because dinoflagellates had different ecological patterns than other taxa (see Results), we further  
162 refined our annotations for these ASVs. For sequence variants both a) assigned to a taxon within  
163 Dinoflagellata, and b) having more than a trivial number of reads in the dataset ( $> 1000$ ), we  
164 considered the geographic range of taxa involved (restricting possible annotations to those taxa  
165 known from the North Pacific) and assigning taxonomy conservatively only in cases of  $>97\%$   
166 sequence identity between the subject and query sequence. Three distinct dinoflagellate  
167 sequences with identical amino-acid translations from the genus *Heterocapsa* co-occurred in  
168 time and space; to avoid pseudoreplication, we treated these as a single taxonomic unit (this  
169 choice did not affect the trends or significance of results). A phylogeny built of the eleven  
170 remaining dinoflagellate sequences (Figure S4) confirmed that family- and genus-level  
171 taxonomic groups occupied monophyletic clades (Li et al., 2015).

## 172 **Statistical Analysis**

### 173 **Community Composition**

174 To confirm the spatial resolution of our eDNA communities, we used non-metric  
175 multidimensional scaling (nMDS) ordination of eDNA indices for all ASVs within each  
176 technical replicate (Port et al., 2016). To derive this index, we first normalized taxon-specific  
177 ASV counts into proportions within a technical replicate, and then transformed the proportion  
178 values such that the maximum across all samples is scaled to 1 for each taxon. Such indexing  
179 improves our ability to track trends in abundance of individual taxa in time and space by  
180 correcting for both differences in read depth among samples and differences in amplification

181 efficiency among sequences; mathematically, it is equivalent to the Wisconsin double-  
182 standardization for community ecology as implemented in vegan (Oksanen et al., 2013). Using  
183 this index, we generated a single Bray-Curtis dissimilarity matrix for sequenced transect samples  
184 from each unique site/month combination and performed ordinations for each using the  
185 metaMDS function of the vegan package for R (Oksanen et al., 2013; R Core Team, 2016) using  
186 a maximum of one-thousand random starts. We then created a single Bray-Curtis dissimilarity  
187 matrix for our entire dataset and apportioned variance by site, month, transect distance, and  
188 sample on the communities present using a PERMANOVA test (implemented with the adonis  
189 function (Oksanen et al., 2013).

## 190 **Habitat preference**

191 To examine the abundance of sequences from each phylum in eelgrass habitat relative to bare  
192 substrate, we first assigned taxonomy to ASVs and trimmed our dataset to taxa within phyla  
193 represented by a total of at least 10,000 reads, a natural break in the histogram of read counts  
194 (Figure S2). To visualize the ecological patterns across taxa, we then examined eDNA indices  
195 for each phylum at the two transect extremes (within-eelgrass vs. bare), calculating a relative  
196 eDNA abundance measure by subtracting the mean eDNA abundance index over bare substrate  
197 for each site-month combination from the corresponding mean eDNA abundance index in the  
198 eelgrass habitat. Positive values of this measure thus denote higher abundance in eelgrass, while  
199 negative values of this index indicate higher abundance over bare substrate. To assess the  
200 statistical significance of these phylum-level differences between habitat types, we compared the  
201 distributions of mean eDNA abundance indices for individual phyla in samples taken from  
202 eelgrass relative to their counterparts taken over bare substrate, using a paired Wilcoxon signed  
203 rank test with Bonferroni correction for multiple comparisons.

## 204 **Dinoflagellate transect patterns**

205 To examine dinoflagellate abundance patterns along the transects from eelgrass to bare habitat,  
206 we first assigned taxonomy to family (or genus, when possible) for all ASVs with at least 1000  
207 reads from the phylum Dinoflagellata. We chose to consider only dinoflagellates with high read  
208 counts in our dataset not necessarily because they are the most prevalent in the environment (raw  
209 read counts are biased by differences in amplification efficiency), but because substantial  
210 numbers of reads allow us to draw more robust conclusions about the distribution of taxa at the  
211 fine geographic scale of our transects. We again calculated an eDNA abundance index for all  
212 technical replicates of each available biological sample on the alongshore transects between the  
213 two habitat extremes. Because plotting data for individual taxa across transects for each site-  
214 month revealed extremely episodic abundance of dinoflagellate sequences (Figure S3), we used  
215 the k-means function of the R stats package (Team & Worldwide, 2015) to separate high- and  
216 low-abundance transects across all dinoflagellate taxa with unsupervised machine learning  
217 (Figure S5). Specifically, we took the grand mean of taxon-specific eDNA indices for each  
218 technical replicate along transects at a given time and place, and subjected these values to  
219 clustering with two groups ( $k = 2$ ).

220 Eight transects identified by unsupervised clustering indicate high-abundance events within at  
221 least one taxon. For these focal transects, we first compared the eelgrass and bare habitat using a  
222 paired Wilcoxon signed-rank test of mean eDNA abundance index for each dinoflagellate taxon  
223 (here, having identified sequences to the level of family or genus, rather than grouping  
224 dinoflagellates together, as we have done above) . Next, to determine whether dinoflagellate  
225 abundance measures at intermediate alongshore transect samples (1, 3, 6, 10, and 15 meters)  
226 were more closely associated with eelgrass or bare habitat, we additionally performed Gaussian

227 mixture modelling with two groups (Scrucca et al., 2016). We then used a Wilcoxon rank sum  
228 test to assess the significance of differences in the dinoflagellate eDNA abundance index  
229 distribution in the two groups produced by model-based clustering. To ensure that these groups  
230 did not result simply from spatial autocorrelation, we calculated Bray-Curtis dissimilarity based  
231 on eDNA abundance indices of all ASVs from adjacent points on each full transect. We tested  
232 the null hypothesis that spatial distance does not significantly influence Bray-Curtis dissimilarity  
233 using a Kruskal-Wallis test.

## 234 **Results**

### 235 **Community Composition**

236 We assigned over 3,000 unique ASVs to 12 phyla comprising a diverse set of single- and  
237 multicellular taxa including Arthropoda (arthropods), Annelida (annelid worms), Bacillariophyta  
238 (diatoms), Bacteroidetes (division of gram-negative, rod-shaped bacteria), Chlorophyta (green  
239 algae), Chordata (chordates), Cnidaria (cnidarians), Dinoflagellata (dinoflagellates),  
240 Echinodermata (echinoderms), Mollusca (molluscs), Ochrophyta (brown algae), and Rhodophyta  
241 (red algae). This represents a broad – although by no means comprehensive – survey of  
242 eukaryotic communities in and around our sampled eelgrass beds.

243 nMDS ordination revealed consistent differentiation between eDNA communities across  
244 transects within a sampling site and date; technical replicates consistently clustered together. An  
245 example plot of samples gathered along the transect from eelgrass to bare substrate at Willapa  
246 Bay in July (Figure 2; all site/date plots shown in Figure S7) shows that the eelgrass community  
247 is quite dissimilar from other transect points along both axes. Moving away from eelgrass, all

248 three technical replicates of each sample bottle are fully distinguishable from those of other  
249 sample bottles (non-overlapping in ordination). For the instances in which complete transects  
250 were sampled at a given time and place (10) and all three technical replicates of a sample were  
251 available for analysis (60), 47 samples (78%) were similarly non-overlapping in ordination with  
252 all remaining transect points, demonstrating that despite proximity at the scale of meters, bottles  
253 of water contained eDNA evidence of distinct biological communities the majority of the time.  
254 Put differently, within-sample variance (reflecting laboratory-driven processes) was smaller than  
255 between-sample variance (reflecting biological as well as laboratory processes), hence providing  
256 resolution of communities at the scale of meters.

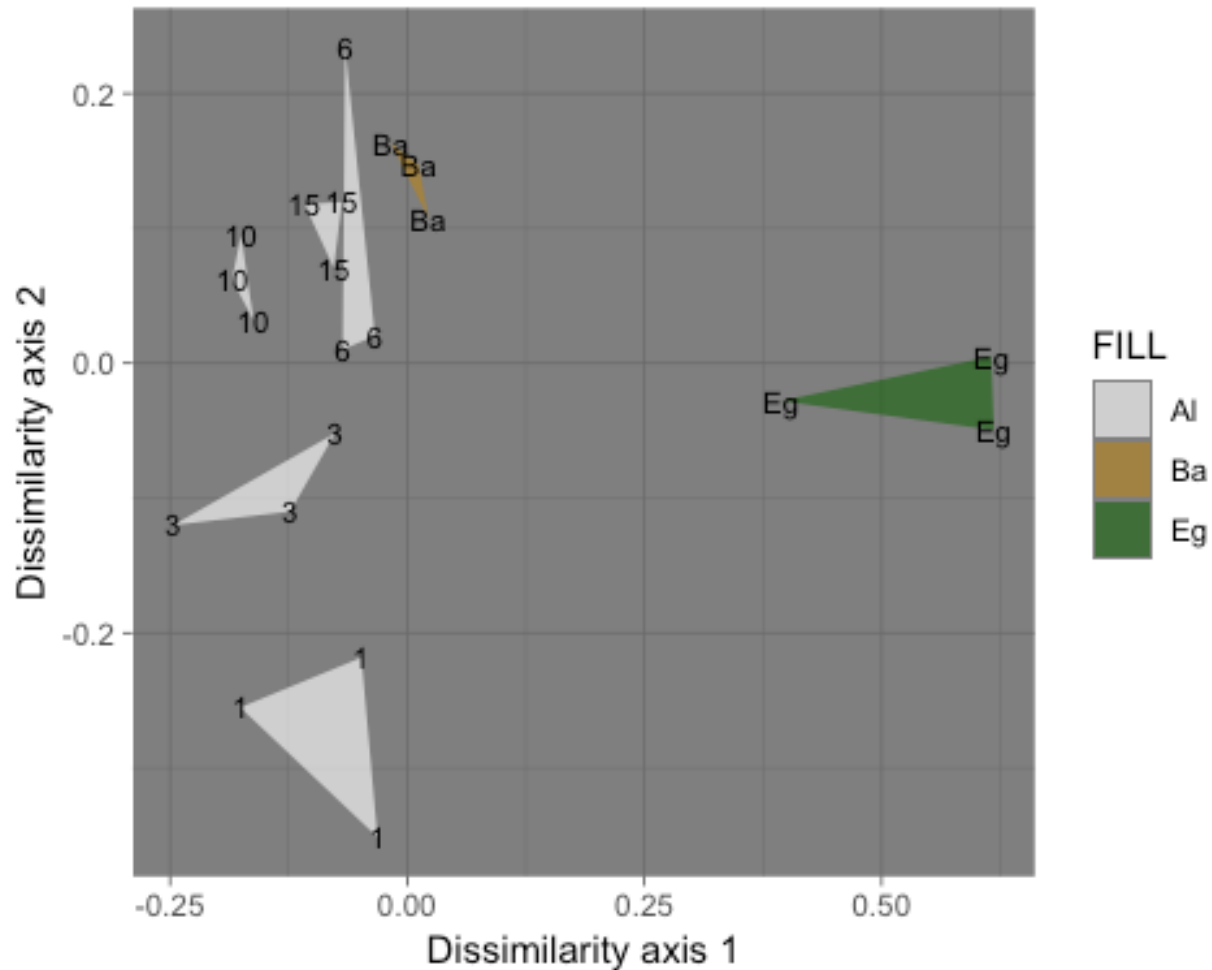

257

258 *Figure 2: Example ordination plot of samples along a single transect from bare to eelgrass*  
259 *positions at Willapa Bay in July, 2017. Technical replicates of each biological sample are*  
260 *grouped as triangles. White alongshore transect samples are labeled with distance from eelgrass*  
261 *in meters; the single within-bed sample is green (labeled Eg) and the bare sample is brown (Ba).*

262 PERMANOVA apportioned the variance in Bray-Curtis distance among samples as follows: site  
263 ( $R^2 = 0.18593$ ,  $p = 0.001$ ), month ( $R^2 = 0.07909$ ,  $p = 0.001$ ), and transect distance ( $R^2 =$   
264  $0.02625$ ,  $p = 0.001$ ) each explain a significant portion of the variance in the dataset. Thus,  
265 despite strong effects of geographic location and season, we do see a highly significant effect of  
266 proximity to eelgrass on the complement of organisms present. Moreover, these results confirm

267 that we can consistently distinguish nearshore eDNA communities – as sampled by our primers –  
268 at spatial scales of meters.

## 269 **Habitat Preference**

270 To determine the habitat preference of major taxa in our dataset at a coarse spatial scale, we  
271 classified ASVs to the level of phylum and plotted an index of their relative sequence abundance  
272 in eelgrass versus bare positions (Figure 3). Positive indices denote greater abundance in  
273 eelgrass, and negative indices in bare substrate. Across all sites and months, only dinoflagellates  
274 show a consistent and strong bias towards one habitat or another; they are nearly universally  
275 more abundant in bare habitat. Indeed, the negative association of dinoflagellates with eelgrass  
276 beds is the only significant result of tests of phylum abundance in the two habitat extremes after  
277 Bon Ferroni correction for multiple comparisons ( $\alpha = 0.0042$ ,  $p = 0.004$ ; paired Wilcoxon signed  
278 rank test). Other single-celled microalgae such as diatoms (Bacillariophyta) and green algae  
279 (Chlorophyta) do not show these same patterns of distribution with respect to eelgrass.



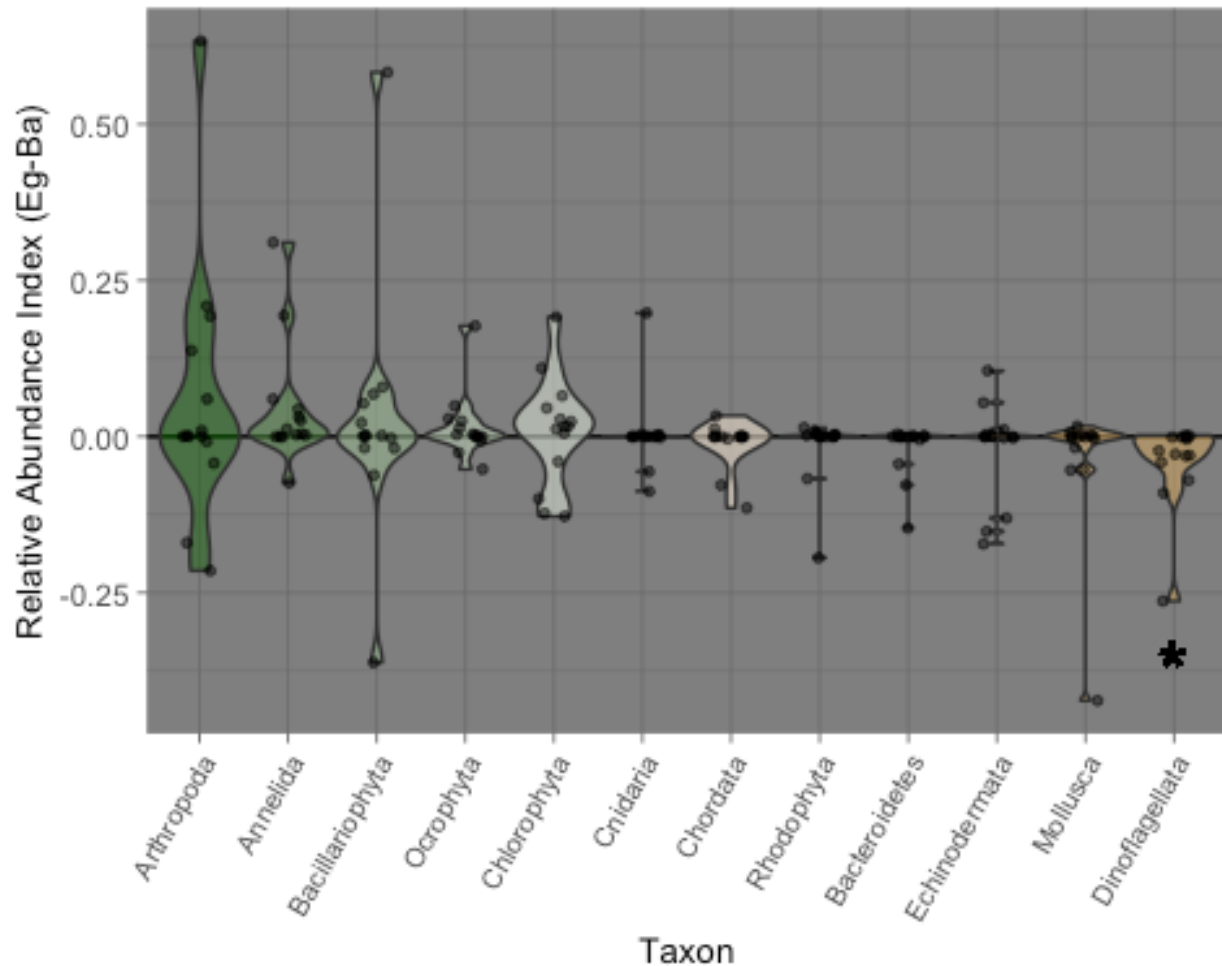

280

281 *Figure 3: Habitat preferences of sequences within each phylum. Phyla are ordered and colored*  
282 *by mean relative abundance index (eDNA abundance index in eelgrass - eDNA abundance index*  
283 *over bare substrate). Greener samples on the left exhibit greater relative abundance in eelgrass,*  
284 *and browner samples on the right exhibit greater relative abundance on bare substrate. The*  
285 *central zero-line indicates no bias in abundance between habitat types.*

## 286 **Dinoflagellate Distributions**

287 To assess the patterns of dinoflagellate abundance that contribute to an overall preference for  
288 habitat bare of eelgrass, we first honed our focus to the eleven dinoflagellate ASVs - roughly,

289 species - with more than 1000 reads in our dataset (Table 2). eDNA indices suggest that  
290 dinoflagellate distributions are highly local and episodic at the scale of our sampling (Figure S3);  
291 each dinoflagellate taxon appears at appreciable levels at only a single site and in no more than  
292 two consecutive sampling periods in our dataset. It is when dinoflagellates are plentiful relative  
293 to background levels that we have the power to identify trends in the abundance of individual  
294 taxa with respect to eelgrass habitat. To restrict our analysis to such periods, we used  
295 unsupervised machine learning (k-means clustering) to define a set of high- and low-abundance  
296 transects for each dinoflagellate sequence across all sites and months (Figure S5; between group  
297 sum of squares / total sum of squares = 81.1 %); eight transects from seven dinoflagellate taxa  
298 appeared in the high-abundance group.

299 *Table 1: Taxon (given as Family (Genus)) and total sequence read count for each dinoflagellate*  
300 *ASV with >1000 total sequence reads.*

| Taxon                           | Count |
|---------------------------------|-------|
| Gonyaulacaceae (Alexandrium)    | 47010 |
| Heterocapsaceae (Heterocapsa 1) | 29912 |
| Gonyaulacaceae (Protoceratium)  | 11948 |
| Gymnodiniaceae (Nusuttodinium)  | 8096  |
| Heterocapsaceae (Heterocapsa 2) | 7382  |
| Gonyaulacaceae (unknown)        | 3897  |
| Kareniaceae (Karlodinium)       | 3515  |
| Gymnodiniaceae (Gymnodinium)    | 3249  |

|                                |      |
|--------------------------------|------|
| Kareniaaceae (unknown)         | 2521 |
| Syndiniaceae (Hematodinium)    | 1401 |
| Peridinales (Proto-peridinium) | 1278 |

301 In this subset of high-abundance transects, we observe that the negative interaction of eelgrass  
302 and dinoflagellates is taxonomically universal; all sequences (from families Gonyalacaceae,  
303 Heterocapsaceae, and Kareniaaceae, each of which include known or suspected HAB species (  
304 IOC Harmful Algal Bloom Programme and the World Register of Marine Species)) are heavily  
305 biased towards bare substrate, relative to eelgrass (Figure 4). A comparison of the mean eDNA  
306 abundance index across technical replicates for each high-abundance transect taxon demonstrates  
307 that this preference for bare substrate over eelgrass is significant (Wilcoxon signed-rank test,  $p <$   
308 0.008).

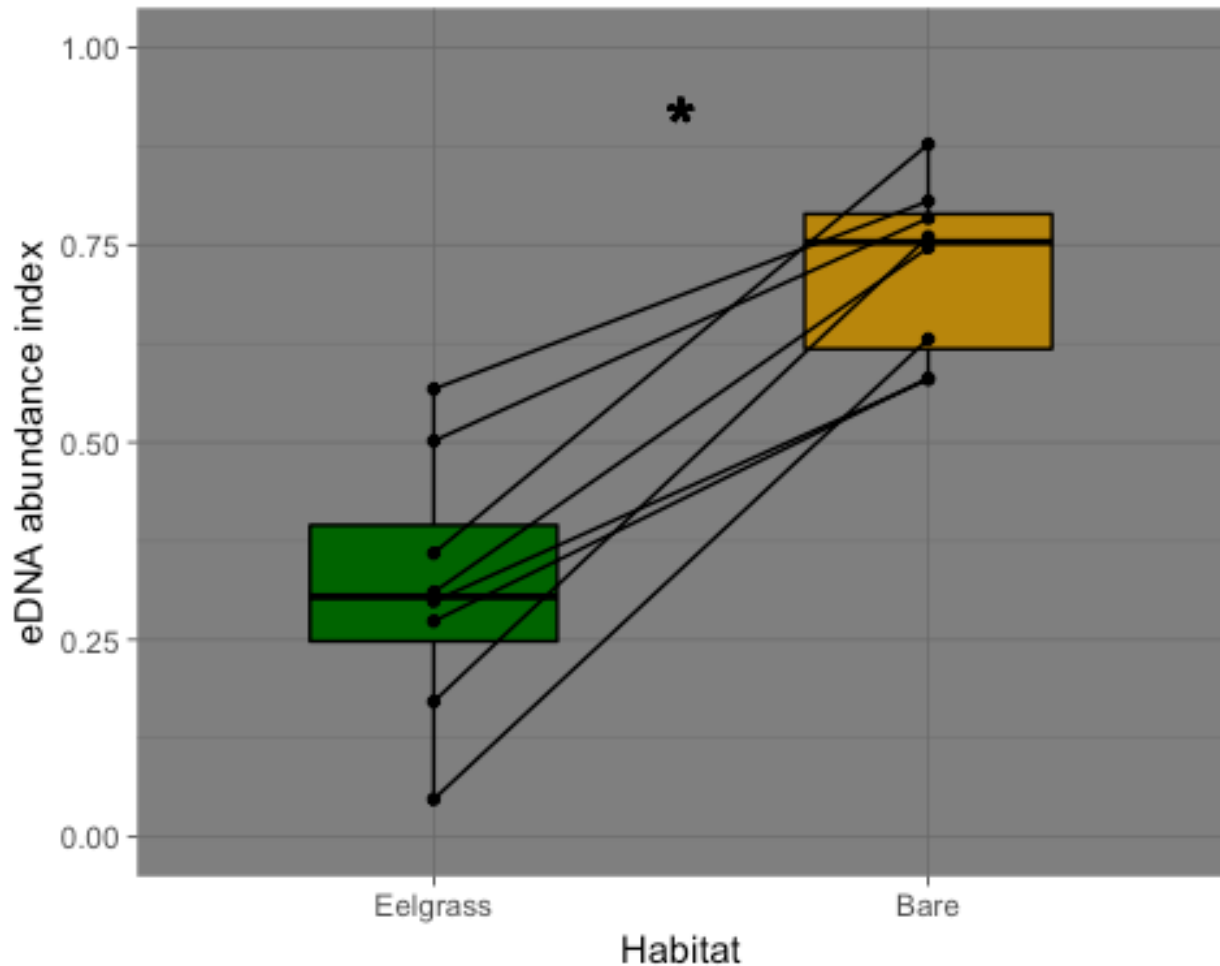

309

310 *Figure 4: Habitat preferences of dinoflagellate sequences at site-months in which each taxon*  
311 *occurs at high abundance.*

312 After demonstrating a preference of all dinoflagellate taxa towards the bare habitat extreme  
313 (when highly abundant), we then characterized the possible influence of eelgrass on the  
314 immediately surrounding environment, as a function of distance from the edge of the beds, using  
315 data from entire transects (Figure 5). Examining all points alongshore, we found that  
316 dinoflagellate eDNA abundance indices at the 1, 3, 6, 10, and 15m positions grouped with those  
317 at the eelgrass position in model-based clustering (probability of assignment to the group with  
318 eelgrass samples was in each case at least  $10^{34}$  more likely than probability of assignment to

319 the group with bare samples). Additionally, the eDNA abundance index of all high-abundance  
320 dinoflagellate taxa at these six transect points together differed significantly from bare substrate  
321 (Wilcoxon signed rank test,  $p < 0.02$ ). These patterns are not simply due to spatial  
322 autocorrelation, as overall Bray-Curtis dissimilarity (from all ASVs) shows no pattern associated  
323 with geographic distance across full transects (Figure S6; Kruskal-Wallis rank sum test,  $p >$   
324 0.9).

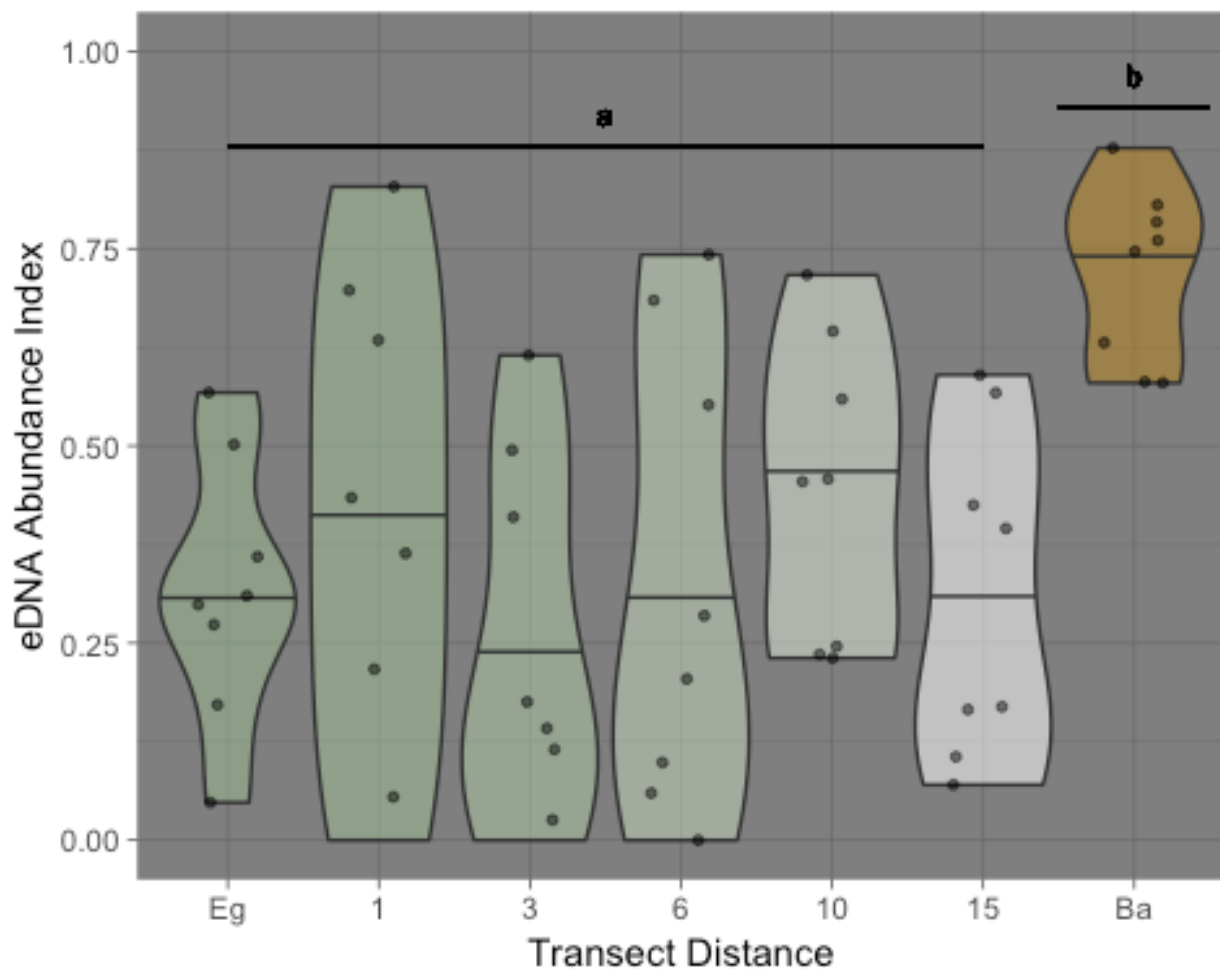

325

326 *Figure 5: Dinoflagellate eDNA abundance measures plotted for all sites and months combined*  
327 *at each point along the transect from eelgrass to bare substrate, with median shown.*

## 328 Discussion

329 In a broad-spectrum eDNA survey of the organisms living in and near to eelgrass, we track the  
330 relative abundance of a diverse group of taxa representing twelve phyla. We demonstrate the  
331 ability of eDNA to distinguish communities represented in samples taken only meters apart, and  
332 to reveal a significant axis of variance based on proximity to habitat type, despite strong  
333 influences of geography and season across sampling events. One major and significant pattern  
334 emerges in our analysis: highly-abundant dinoflagellate taxa are more common over bare  
335 substrate than within eelgrass beds, and the putative effect of eelgrass extends at least 15m  
336 beyond the edge of the beds themselves.

337 In line with our community-level observation, a specific allelopathy against microalgal species  
338 by *Z. marina* was first described over 30 years ago (Harrison & Durance, 1985). More recent  
339 evidence suggests that this negative interaction applies to multiple HAB taxa (including  
340 *Alexandrium*, also observed in this study), and is mediated in our sampling locations by a variety  
341 of strains of eelgrass-associated algicidal and growth-inhibiting bacteria, particularly from  
342 *Erythrobacter*, *Teredinibacter*, *Gaetbulibacter*, and *Arthrobacter* genera (Inaba et al., 2017)  
343 (though the eDNA primers employed here amplify eukaryotes almost exclusively and therefore  
344 do not allow us to test this mechanism directly). However, in our dataset the repressive effect of  
345 eelgrass notably does not extend at the phylum level to other phytoplankton such as diatoms  
346 (*Bacillariophyta*) and green algae (*Chlorophyta*), despite reports that *Z. marina* habitat can deter  
347 members of these taxa as well (reviewed in Gross, 2003).

348 Dinoflagellates responsive to eelgrass habitat when at high abundance in our dataset include  
349 species from the genera *Heterocapsa*, *Alexandrium*, *Karlodinium*, *Protoceratium*, and from

350 families *Gonyaulacaceae* and *Kareniaceae*, each of which have at least one member included in  
351 local microscopy-based monitoring programs (Amelia Kolb & Swanson, 2016; Vera Trainer,  
352 2016); our eDNA methodology thus agrees broadly with previous visual identification of  
353 microalgae. Of particular interest are dinoflagellate taxa that include HAB-forming members: the  
354 resident species of *Alexandrium* (*A. catanella*) causes paralytic shellfish poisoning via  
355 production of saxitoxin (STX; Wiese et al., 2010), and species from both the genus  
356 *Protoceratium* (e.g. *P. reticulatum*) and the family *Gonyaulacaceae* (e.g. *Gonyaulax spinifera*)  
357 produce yessotoxins (YTXs), whose effects on human consumers of contaminated shellfish are  
358 complex and unclear (reviewed in Tubaro et al., 2010). Toxins from these three taxa impact the  
359 aquaculture and harvest industries directly; detection of STX at concentrations greater than 80 µg  
360 STXequiv/100 g is routinely responsible for regional harvest closures (Moore et al., 2009), and  
361 shellfish containing more than 0.1 µg YTX equiv/100g may not be sold to markets within the  
362 European Union, although this toxin is not currently regulated within the US (Trainer et al.,  
363 2013). In summary, the dinoflagellate taxa deterred by eelgrass habitat in this study have high  
364 relevance for local shellfish management decisions, particularly as HABs (including  
365 *Alexandrium*) are intensifying with recent ocean warming in the North Pacific (Gobler et al.,  
366 2017).

367 In order to understand the relationship of *Z. marina* to ecosystem and human health, as well as to  
368 shellfish farming and harvest, it is critical to consider our addition of an ‘action-at-a-distance’  
369 element to the existing eelgrass-dinoflagellate interaction model. Given the protected status of *Z.*  
370 *marina* habitat on the Pacific Coast of the United States, the goals of the shellfish industry and  
371 eelgrass conservation are often perceived as being in conflict (Forrest et al., 2009) and policies  
372 prohibit shellfish farming and harvesting within or near beds. For example, in Washington State,



373 required buffer zones between shellfish aquaculture and eelgrass range from 3 to 8m, depending  
374 on the agency involved (National Marine Fisheries Service West Coast Region, 2017). However,  
375 our work demonstrates that *Z. marina* habitat may have a protective effect against harmful  
376 dinoflagellates within these buffer zones, reducing the potential for shellfish to accumulate HAB  
377 toxins from the surrounding waters. Likewise, filter feeders can mitigate microbial disease in  
378 adjacent environments, and *M. gigas*, in particular, has recently been shown to lessen the effects  
379 of Eelgrass Wasting Disease (EWD) on *Z. marina* (Groner et al., 2018). As others have begun to  
380 suggest, then, eelgrass and oysters may be critical allies to one another in changing marine  
381 ecosystems worldwide. Future work will examine their multi-faceted symbiosis, particularly in  
382 characterizing the taxonomic breadth of potential seagrass and shellfish partnerships, as well as  
383 in defining the molecular mechanisms underlying the roles of both beneficial and detrimental  
384 microbial intermediates.

## 385 Supplemental Materials

386 *Table S1: Sample information. For each site, Case Inlet (CI), Port Gamble (PG), Nisqually*  
387 *Reach (NR), Skokomish (SK), and Willapa Bay (WB), approximate transect positions are*  
388 *recorded, as well as latitude, longitude, and the approximate geographic distance of each*  
389 *sample from the eelgrass bed edge, calculated from coordinates. Negative distances indicate*  
390 *samples within the eelgrass bed itself. Columns named May, July, and August list the number of*  
391 *technical replicates passing quality control measures of three sequenced from each bottle of*  
392 *water. NA indicates samples that were not gathered, and asterisks indicate samples for which*

393 *three technical replicates were sequenced on two separate MiSeq runs to characterize the*  
394 *importance of sequencing run in explaining variation among samples.*

| Site | Position | long        | lat       | Distance | May | July | August |
|------|----------|-------------|-----------|----------|-----|------|--------|
| CI   | Eelgrass | -122.79645  | 47.358439 | -47      | 3   | 6*   | 3      |
| CI   | Along 1  | -122.79584  | 47.358455 | 1        | 3   | 3    | 3      |
| CI   | Along 3  | -122.796038 | 47.358565 | 3        | 3   | 3    | 3      |
| CI   | Along 6  | -122.795971 | 47.358551 | 6        | 3   | 3    | 2      |
| CI   | Along 10 | -122.795894 | 47.358481 | 10       | 3   | 3    | 2      |
| CI   | Along 15 | -122.795817 | 47.358436 | 15       | 1   | 3    | 2      |
| CI   | Bare     | -122.79576  | 47.357937 | 57       | 3   | 3    | 3      |
| NR   | Eelgrass | -122.726752 | 47.101926 | NA       | 3   | 3    | 2      |
| NR   | Bare     | -122.726386 | 47.101713 | NA       | 3   | 3    | 3      |
| PG   | Eelgrass | -122.58292  | 47.847983 | -80      | 3   | 3    | 3      |
| PG   | Along 1  | -122.583221 | 47.84866  | 1        | 3   | 3    | 2      |
| PG   | Along 3  | -122.583157 | 47.848705 | 3        | 3   | 2    | 2      |
| PG   | Along 6  | -122.583222 | 47.848725 | 6        | 3   | 3    | 0      |
| PG   | Along 10 | -122.583278 | 47.848756 | 10       | 3   | 3    | 3      |
| PG   | Along 15 | -122.583258 | 47.848781 | 15       | 3   | 3    | 3      |
| PG   | Bare     | -122.58383  | 47.842676 | 666      | 3   | 6*   | 3      |
| SK   | Eelgrass | -123.156623 | 47.354332 | -52      | 3   | 3    | 3      |

|    |          |             |           |     |    |   |    |
|----|----------|-------------|-----------|-----|----|---|----|
| SK | Along 1  | -123.157147 | 47.354626 | 1   | NA | 3 | 3  |
| SK | Along 3  | -123.157132 | 47.354585 | 3   | NA | 3 | 2  |
| SK | Along 6  | -123.157116 | 47.354634 | 6   | NA | 3 | 3  |
| SK | Along 10 | -123.157162 | 47.354644 | 10  | NA | 3 | 3  |
| SK | Along 15 | -123.157185 | 47.354733 | 15  | NA | 3 | 2  |
| SK | Bare     | -123.157314 | 47.35502  | 45  | 3  | 3 | 3  |
| WB | Eelgrass | -124.02619  | 46.495137 | -90 | 3  | 3 | NA |
| WB | Along 1  | -124.02622  | 46.494334 | 1   | 3  | 3 | 2  |
| WB | Along 3  | -124.02627  | 46.494347 | 3   | 3  | 3 | 3  |
| WB | Along 6  | -124.02626  | 46.494425 | 6   | 3  | 3 | 3  |
| WB | Along 10 | -124.02624  | 46.494437 | 10  | 3  | 3 | 3  |
| WB | Along 15 | -124.02619  | 46.494479 | 15  | 3  | 3 | 3  |
| WB | Bare     | -124.026136 | 46.494479 | 16  | 3  | 3 | 3  |

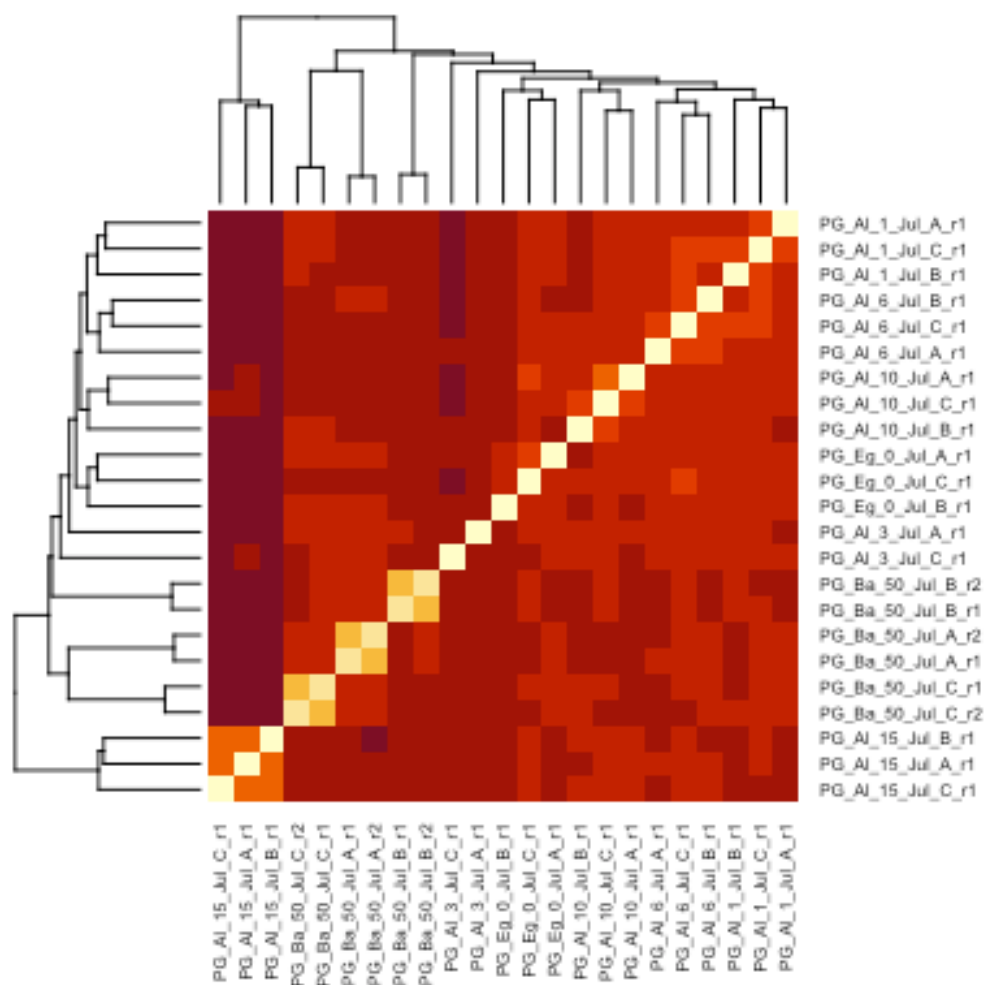

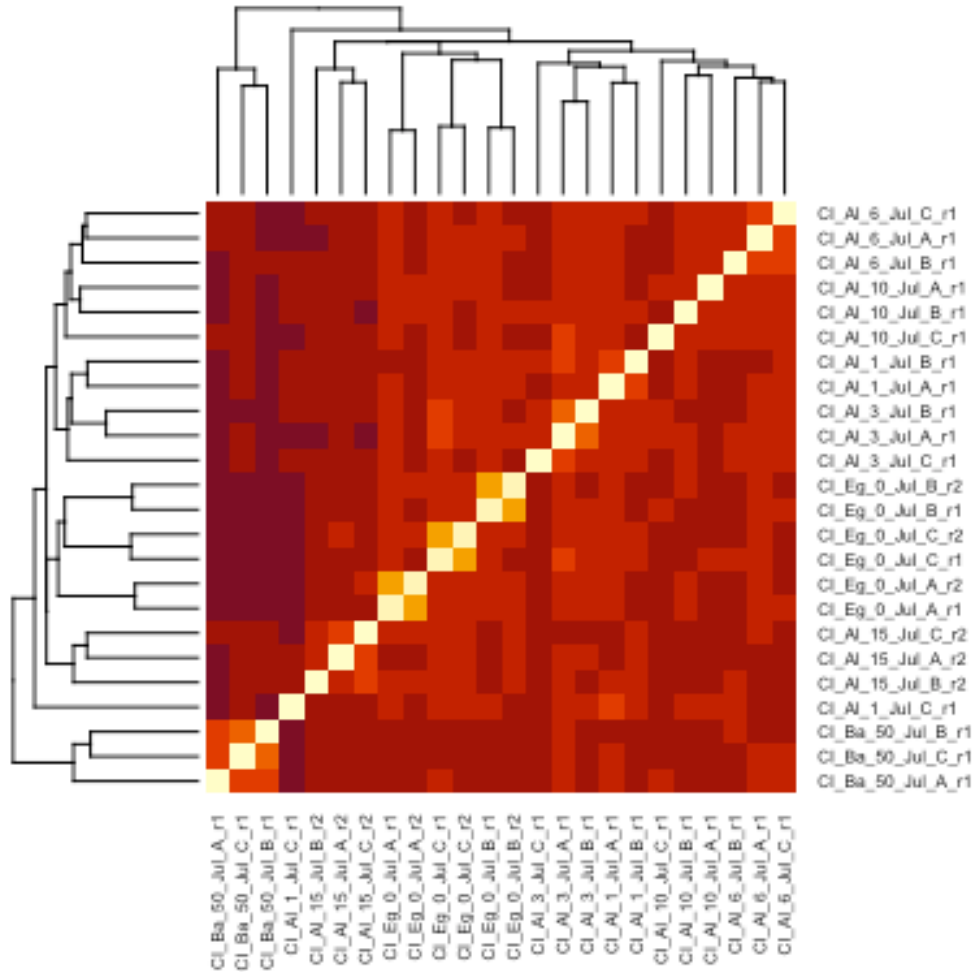

396

397 *Figure S1: Hierarchical clustering from transect Bray-Curtis distance matrices in which three*  
398 *technical replicates were sequenced on two different runs. Names of technical replicates contain*  
399 *sample information separated by '\_' as follows: Site abbreviation, position abbreviation,*  
400 *transect distance, month, replicate, and sequencing run. Note that all replicates from Miseq run*  
401 *2 (r2) cluster with the corresponding replicates from Miseq run 1 (r1) for both Port Gamble July*  
402 *and Case Inlet July transects.*

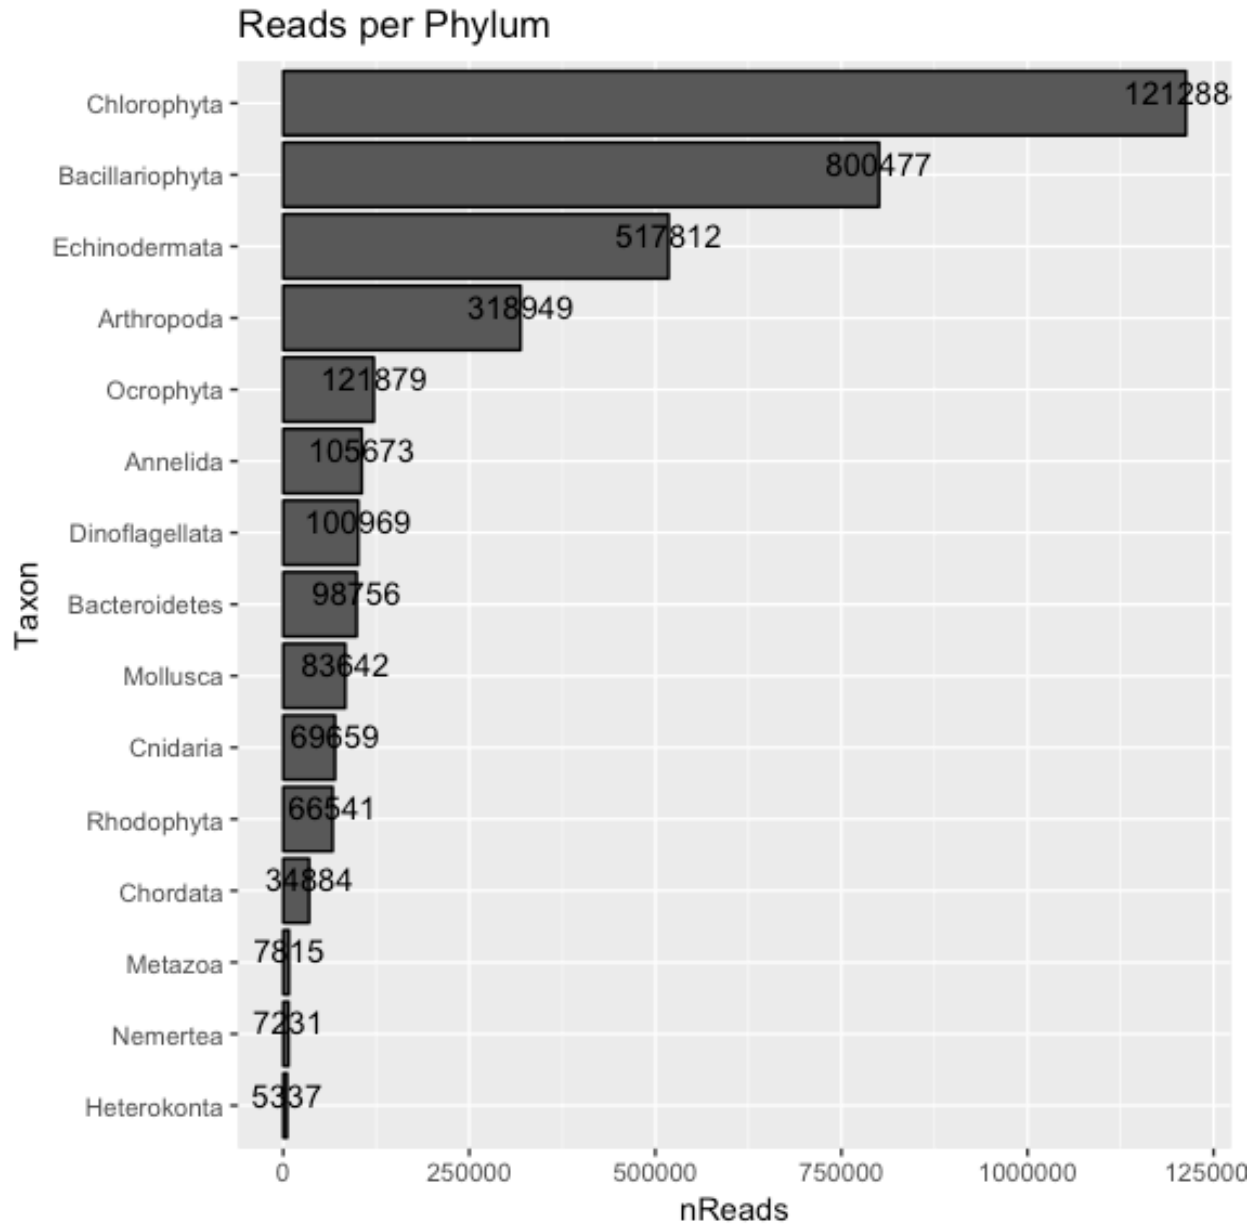

403

404 *Figure S2: Histogram of read counts assigned to each phylum within the complete dataset. Phyla*

405 *with >10000 reads were chosen for further consideration.*

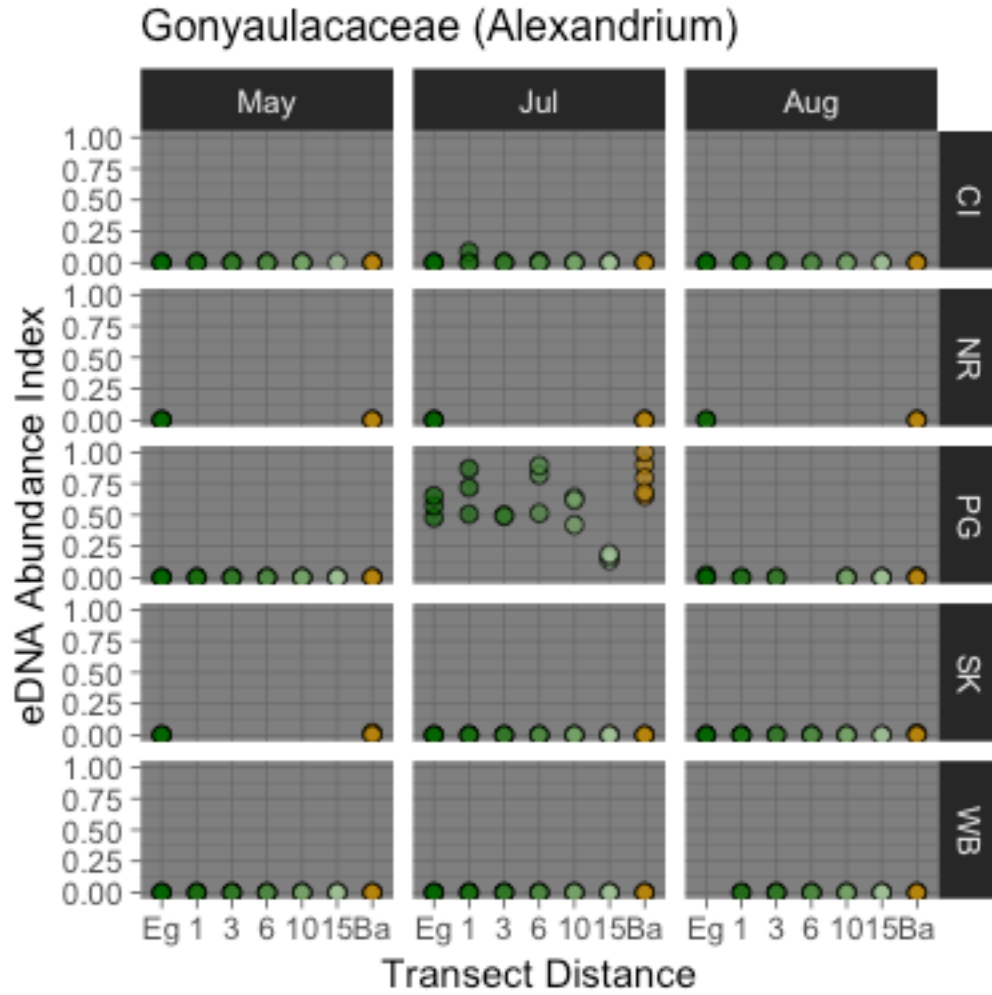



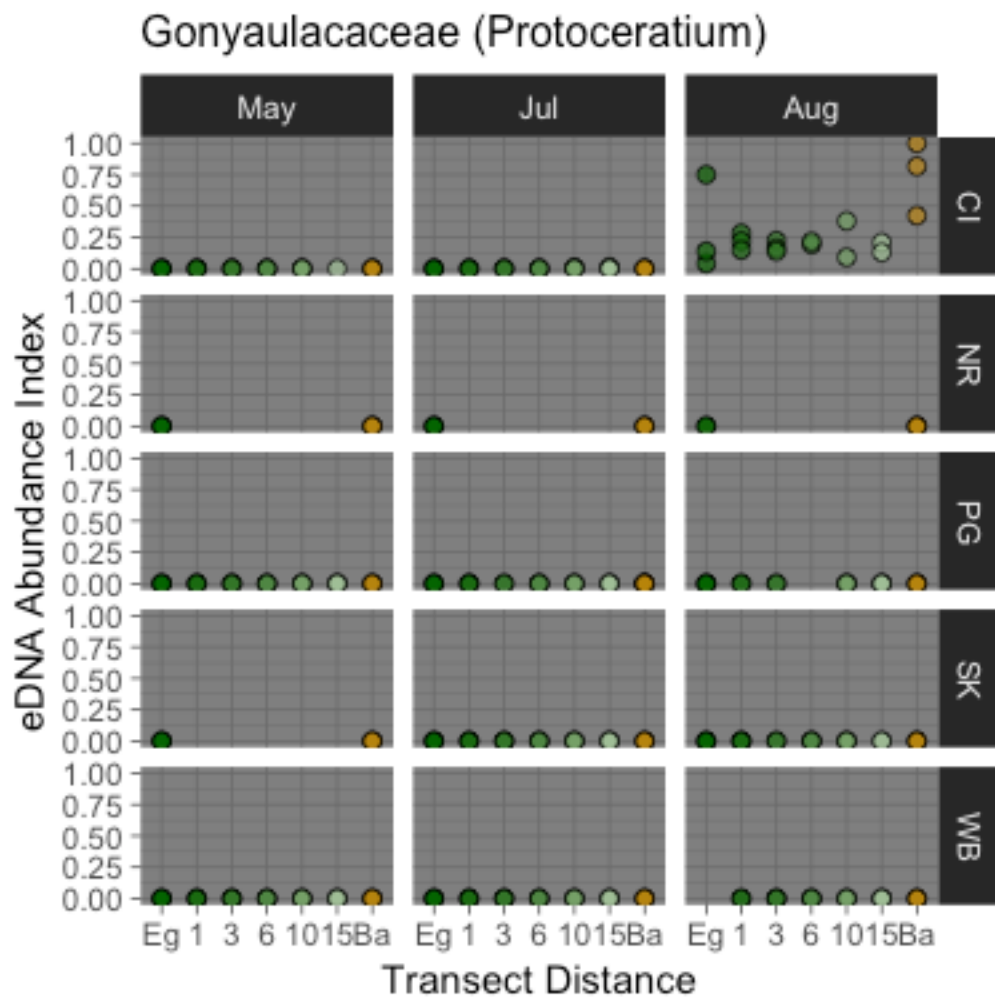

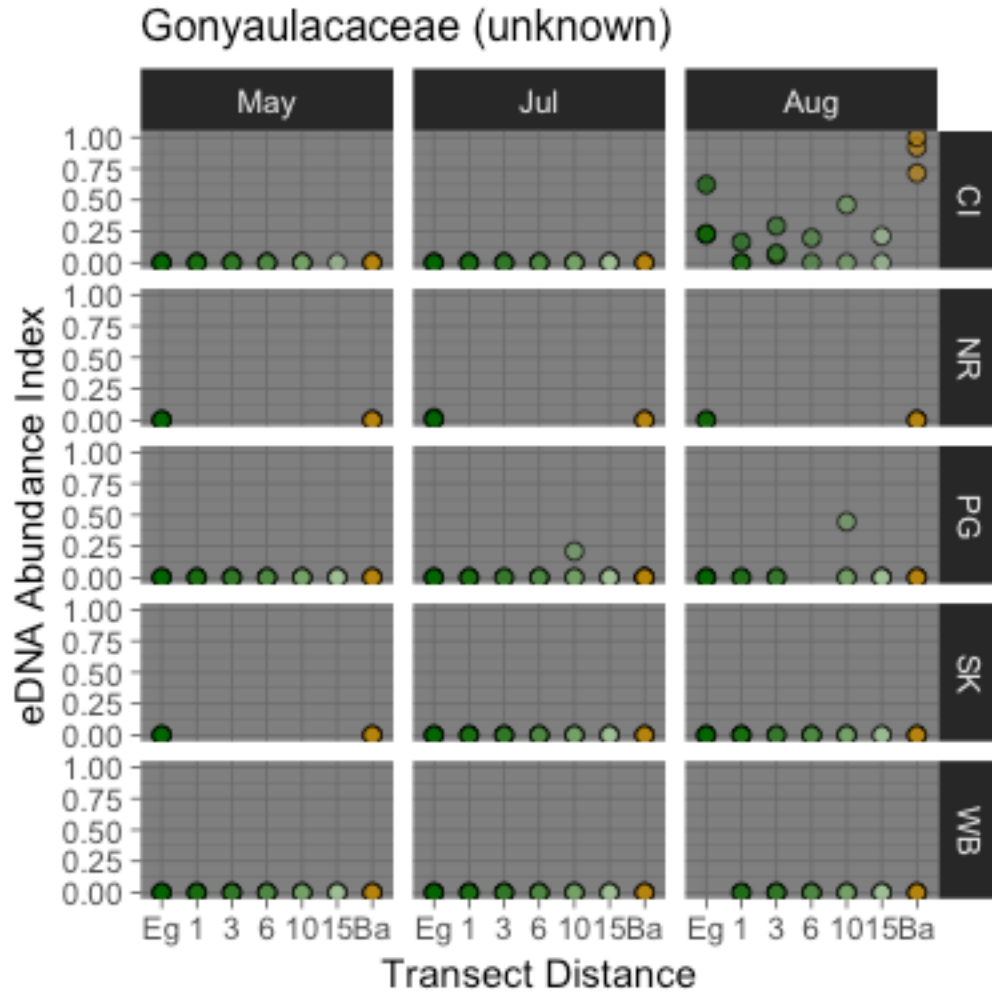

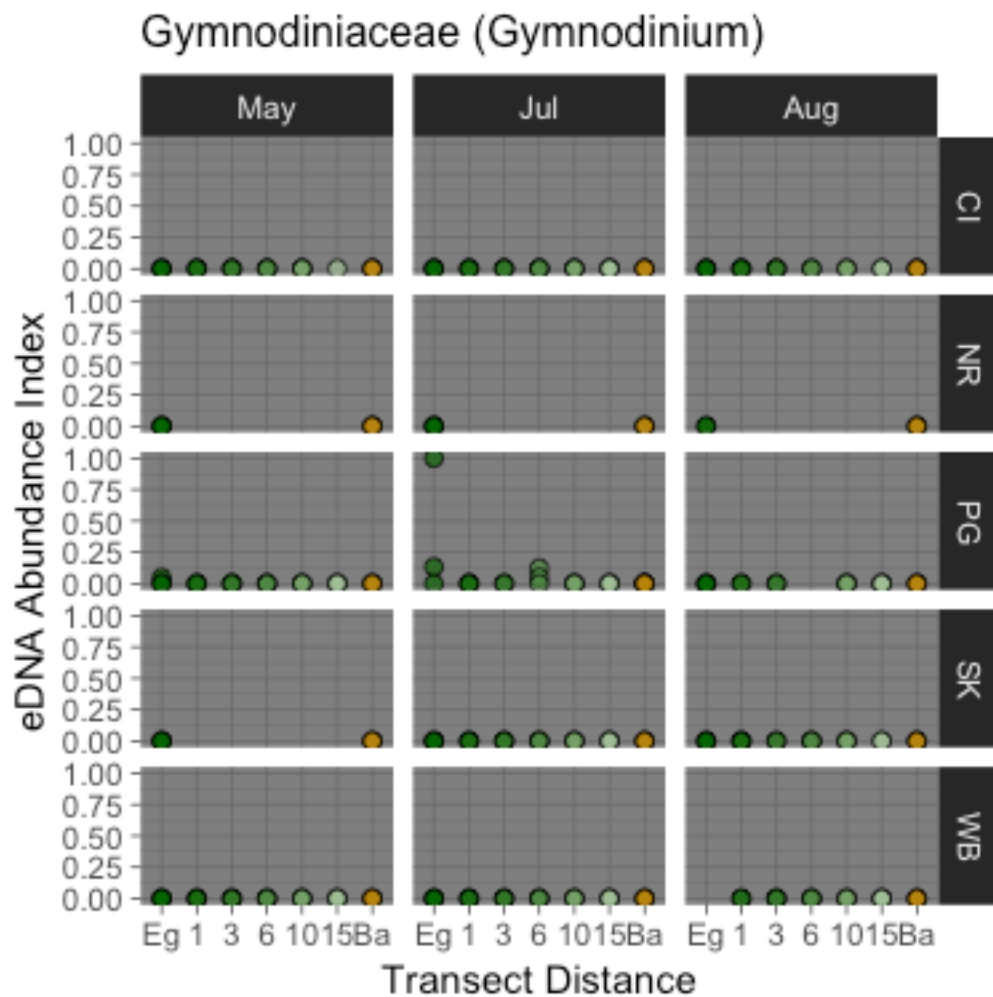

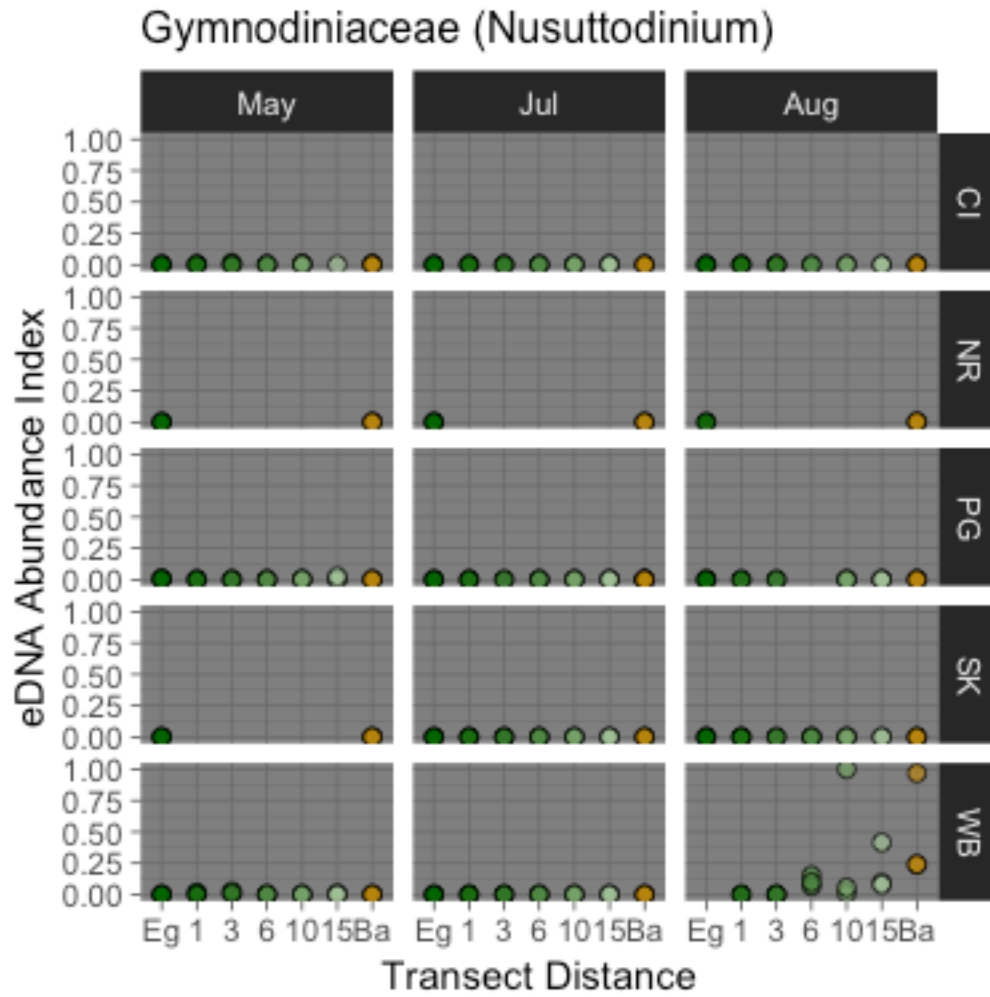

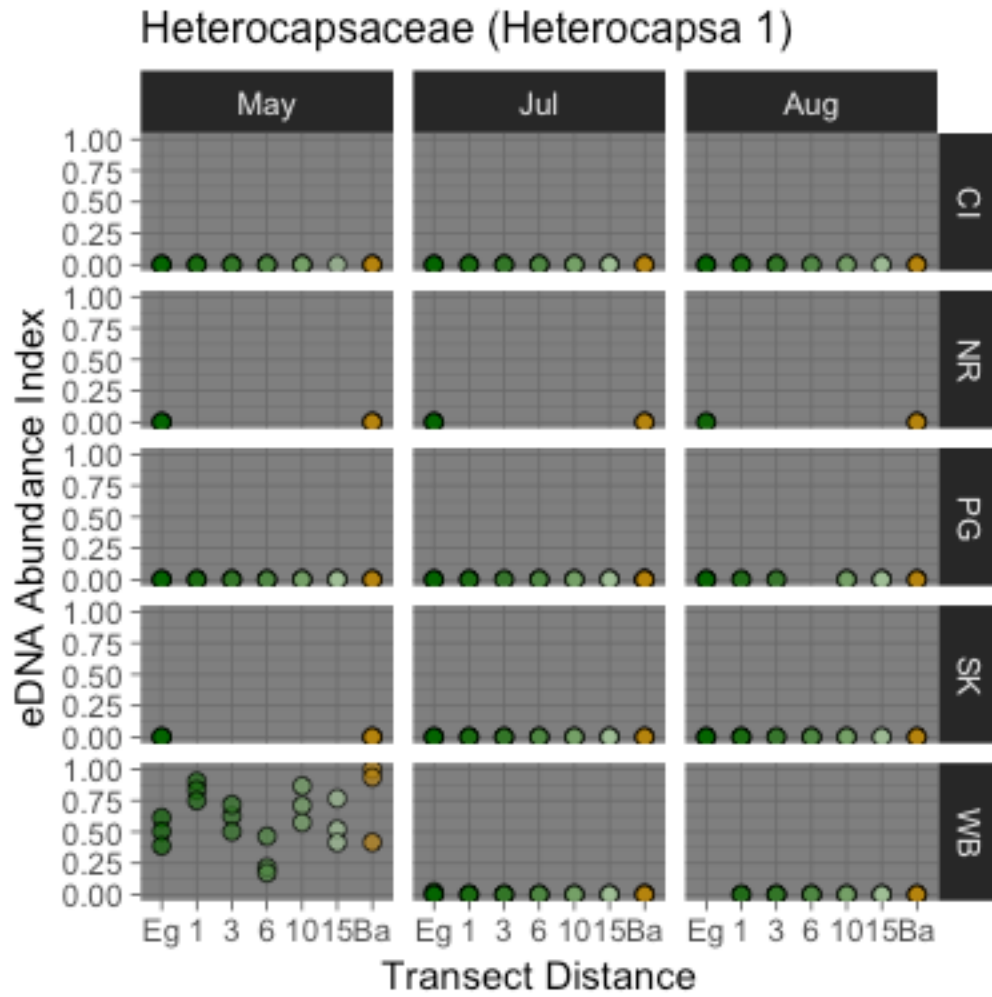

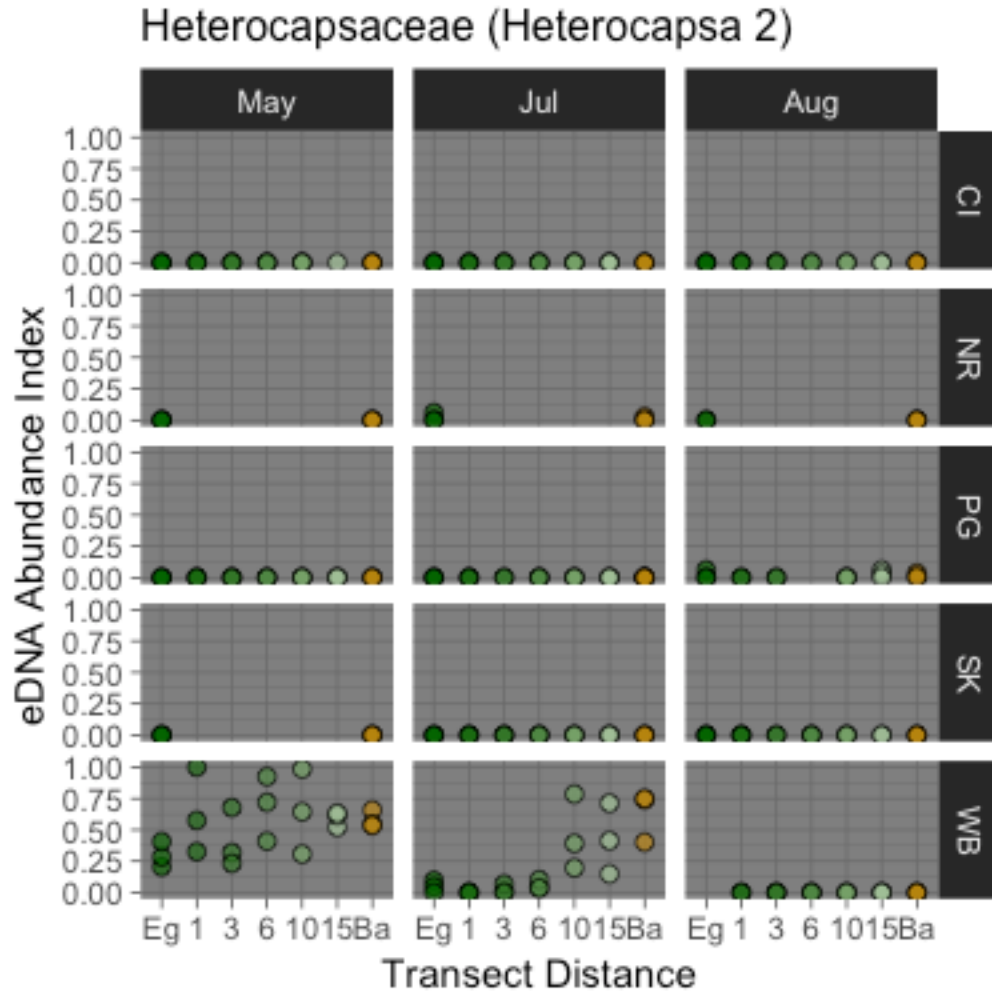

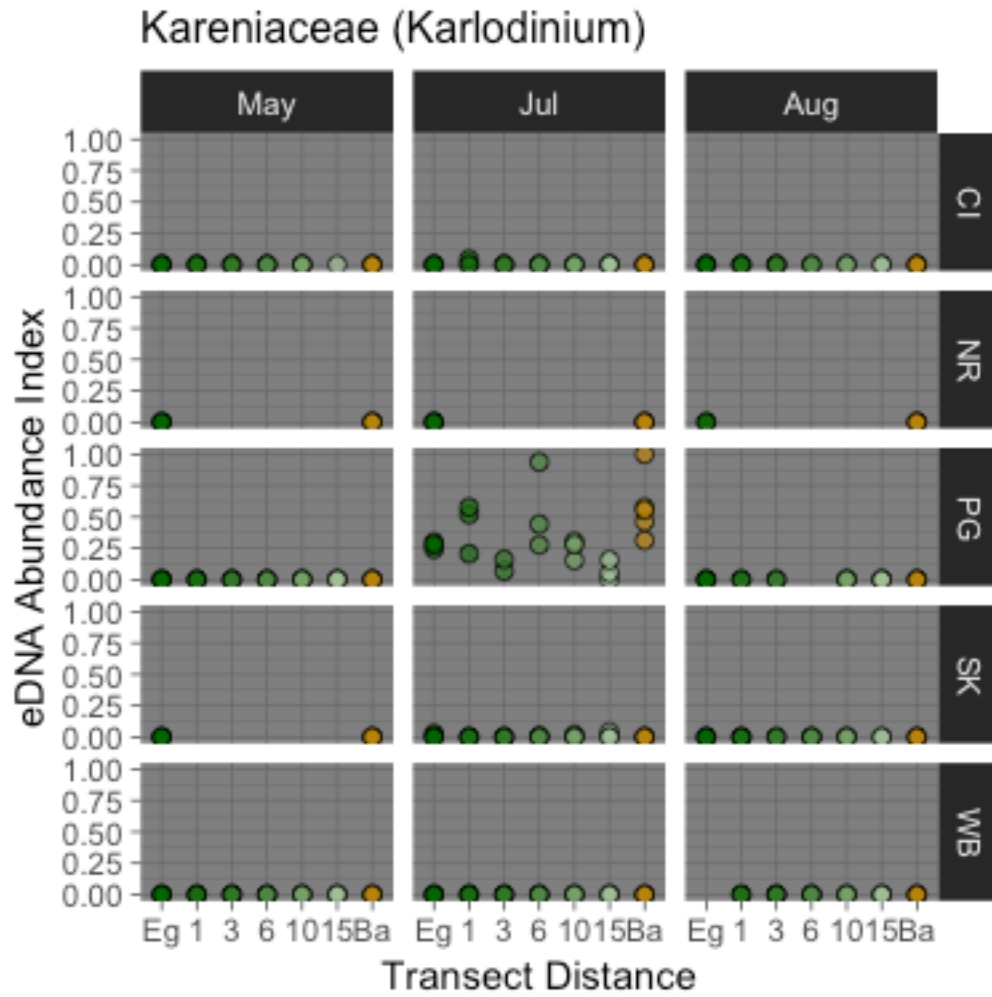



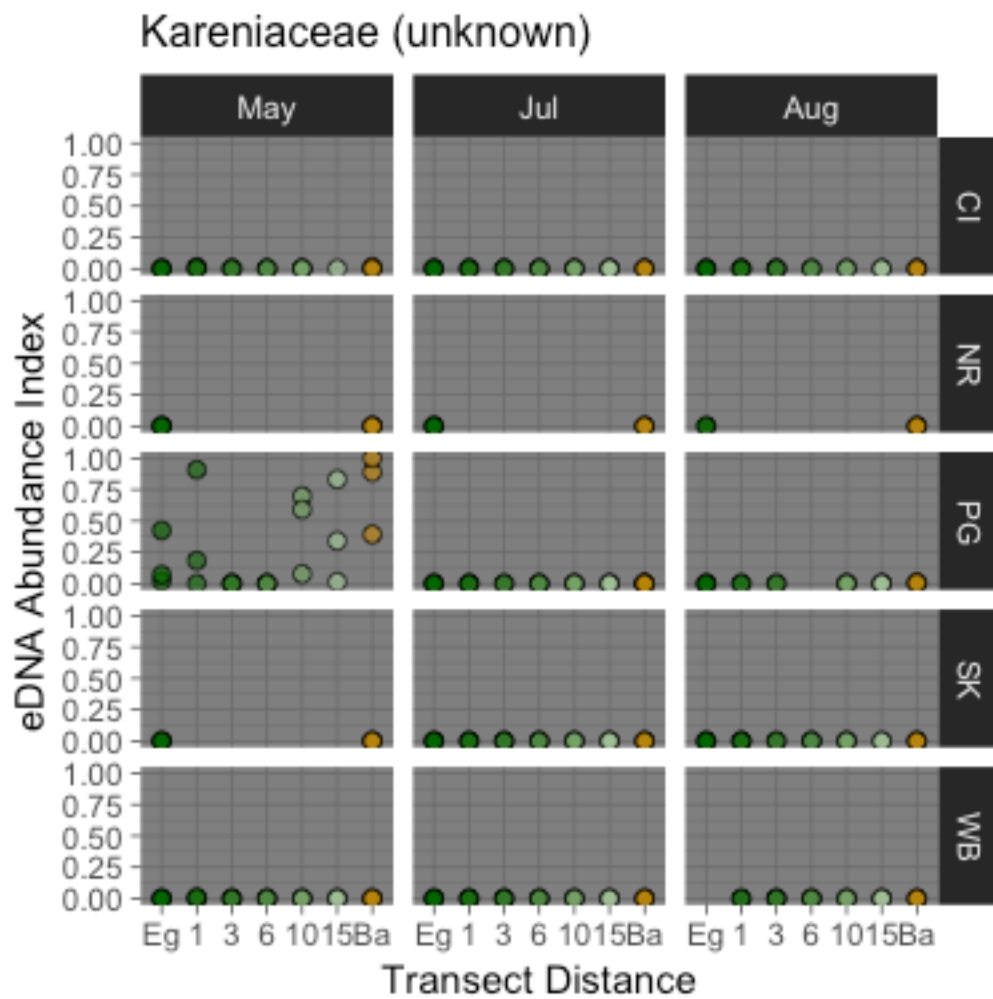

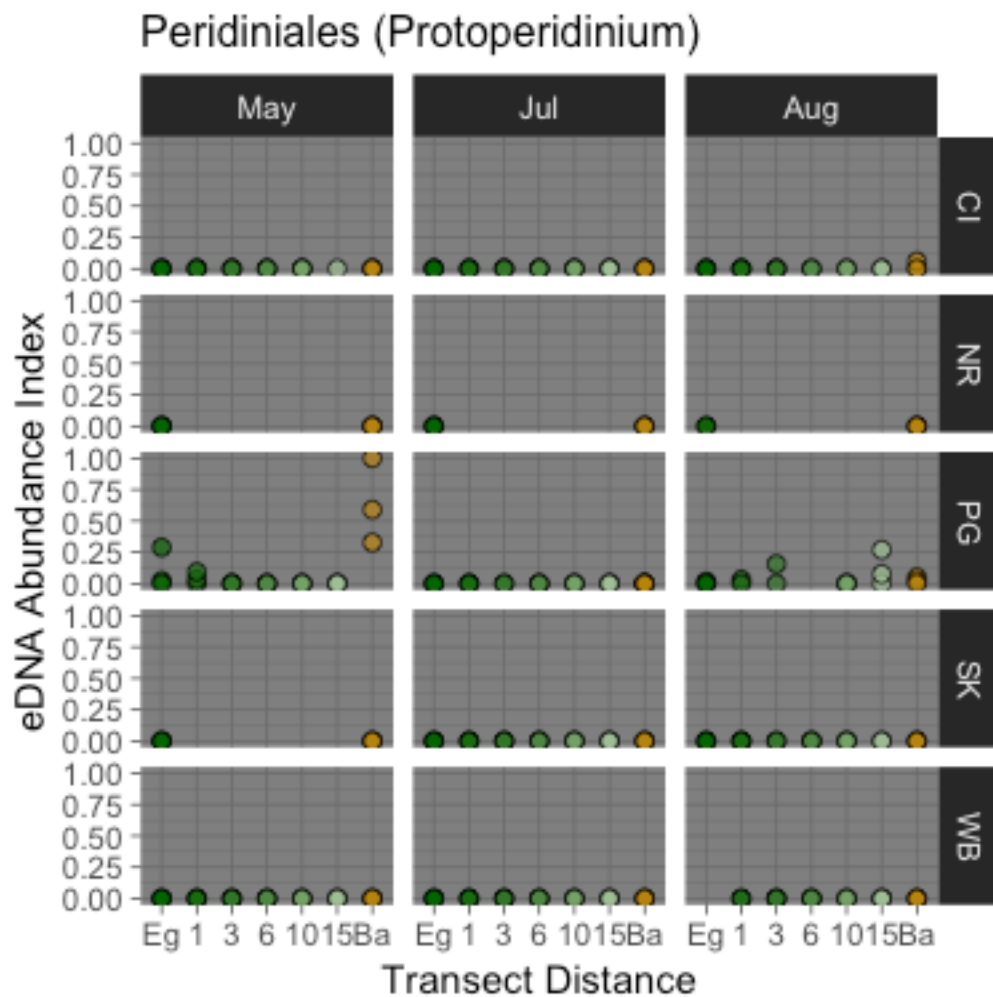

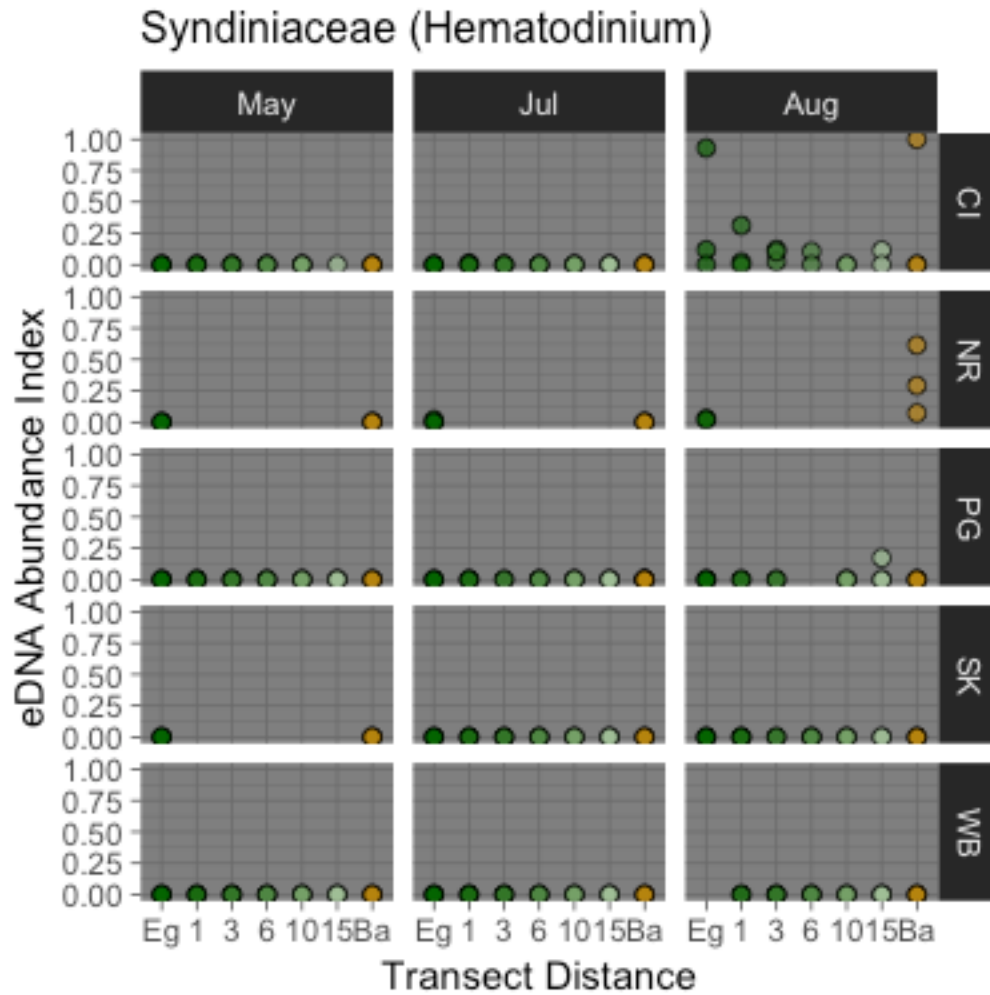

416

417 *Figure S3: eDNA indices from each technical replicate of biological samples for each*  
418 *dinoflagellate family represented in our dataset by >1000 sequence reads, plotted at all sites for*  
419 *which complete transect data were available. Color indicates proximity to eelgrass habitat (dark*  
420 *green) versus bare substrate (brown).*

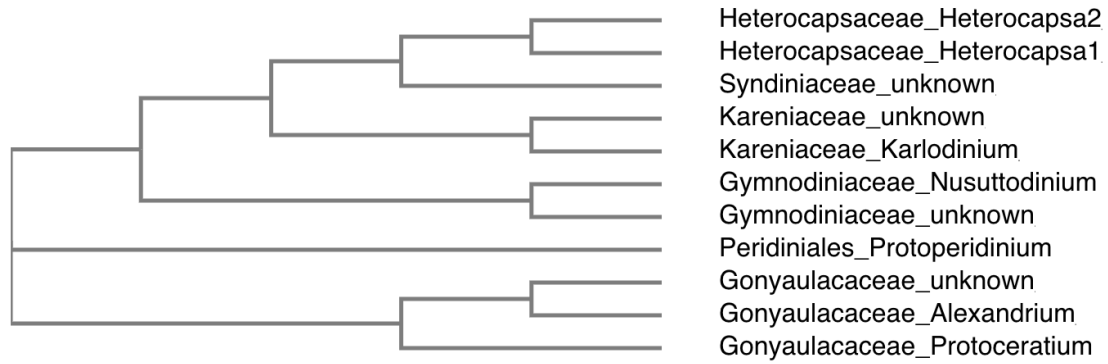

421

422 *Figure S4: Phylogeny of dinoflagellate sequences from high-abundance transects. Individual*

423 *sequences are named with Family\_Genus information (when known).*

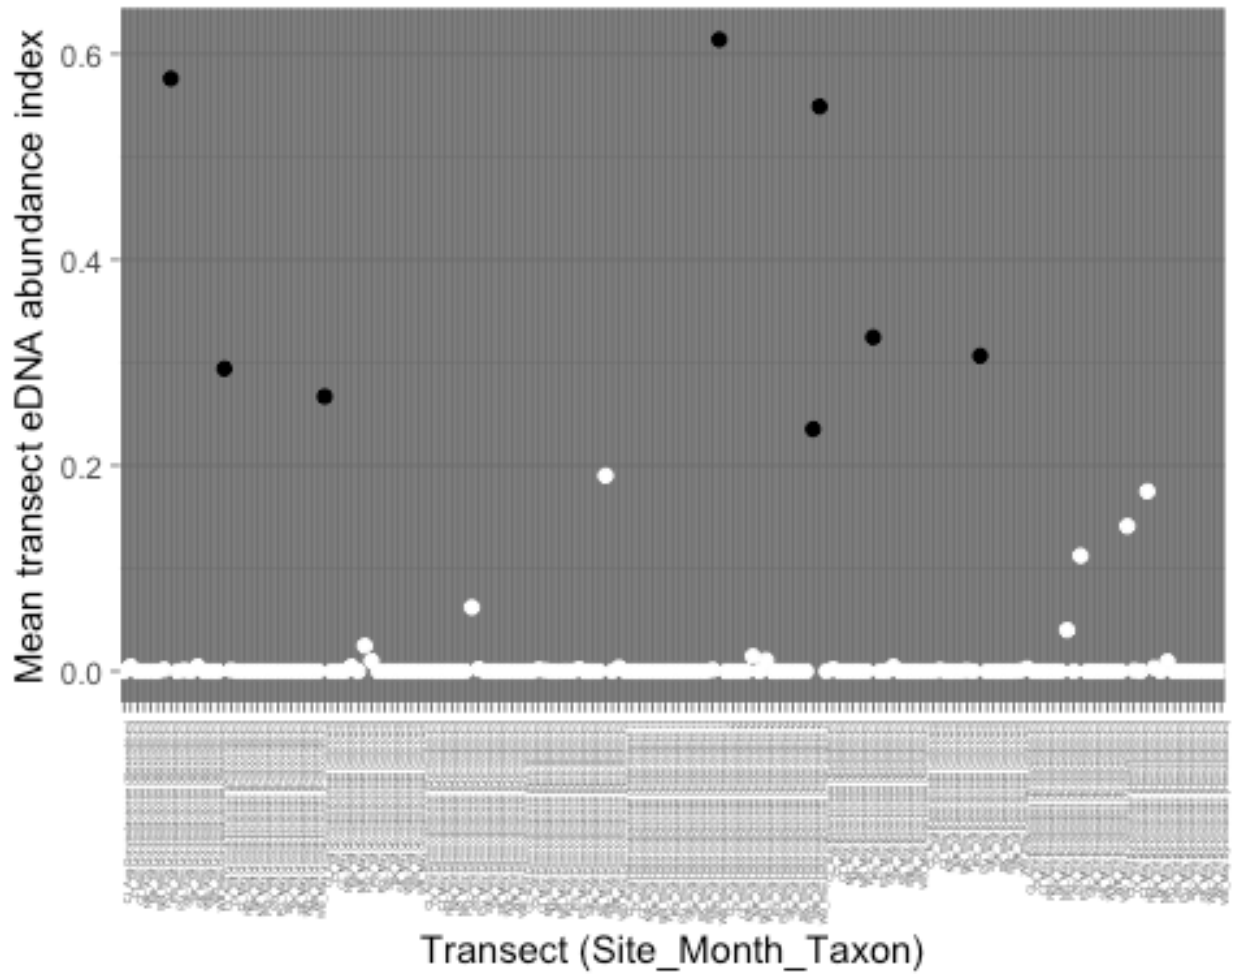

424

425 *Figure S5: High- and low-abundance transects generated with kmeans unsupervised machine*  
426 *learning. Black points indicate high-abundance transects; white points indicate low-abundance*  
427 *transects*

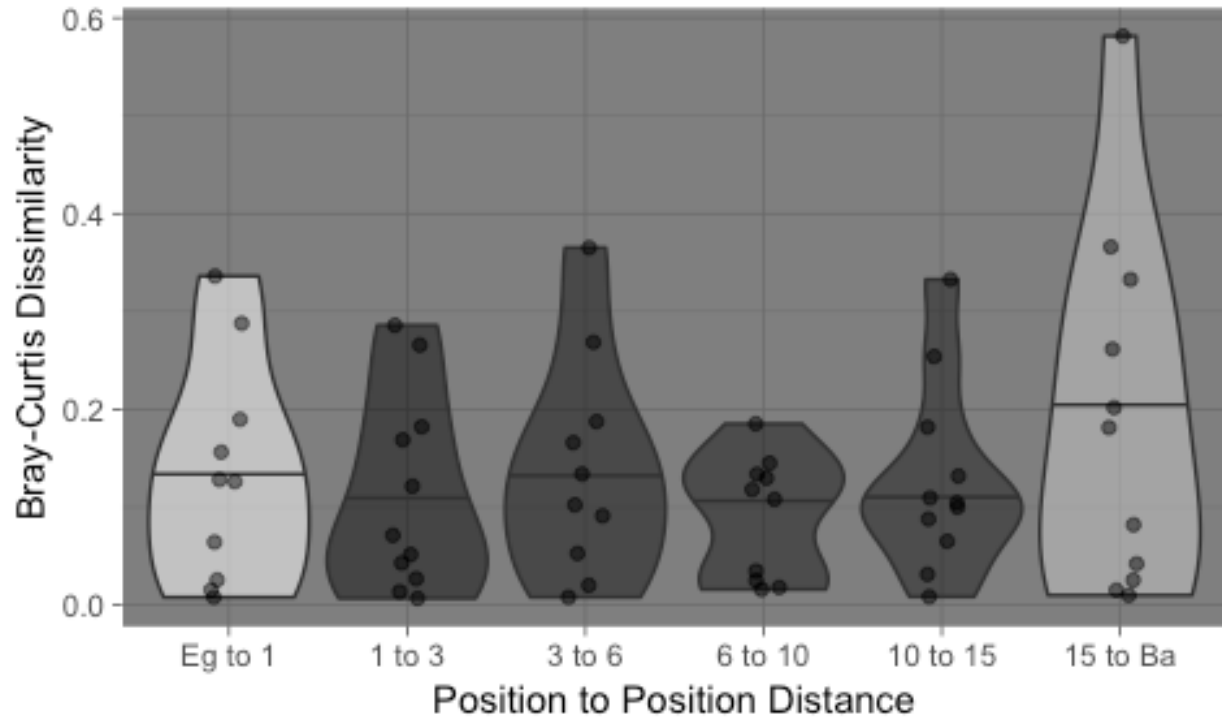

428

429 *Figure S6: Bray-Curtis dissimilarity between eDNA communities surveyed at adjacent points*  
430 *along each full transect (all sites and months). Shading of violins indicates median spatial*  
431 *distance between communities (dark = closer, light = more distant).*

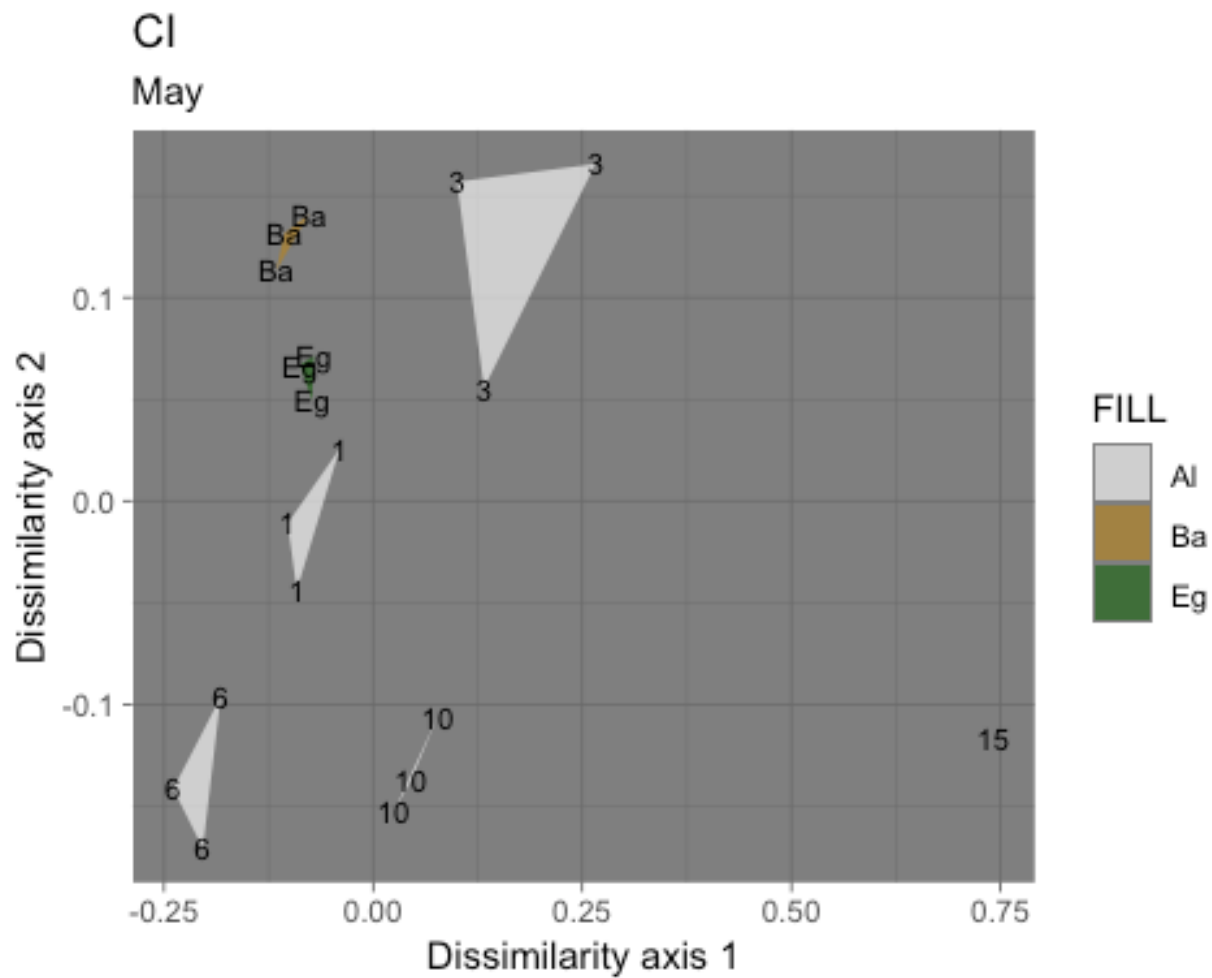

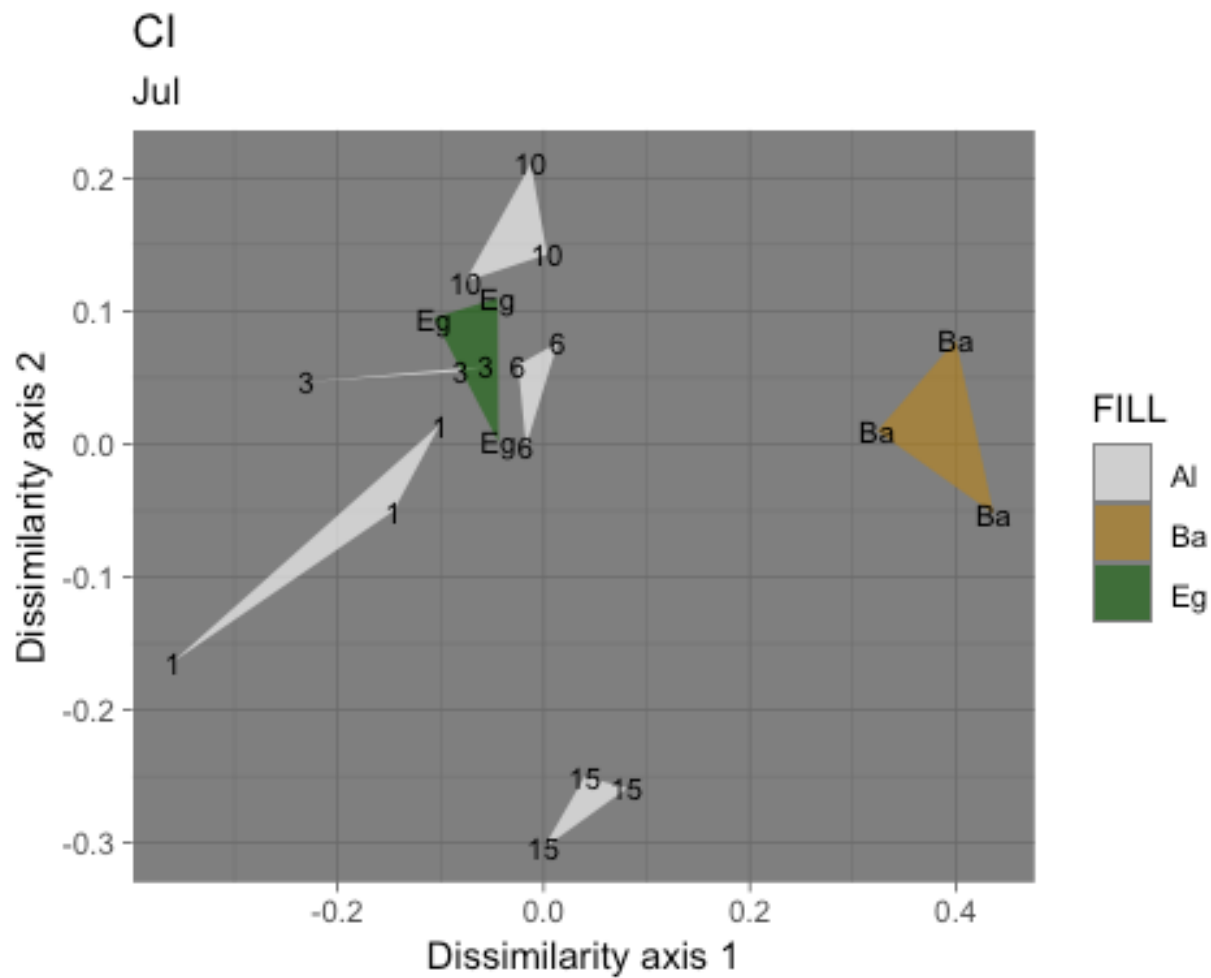



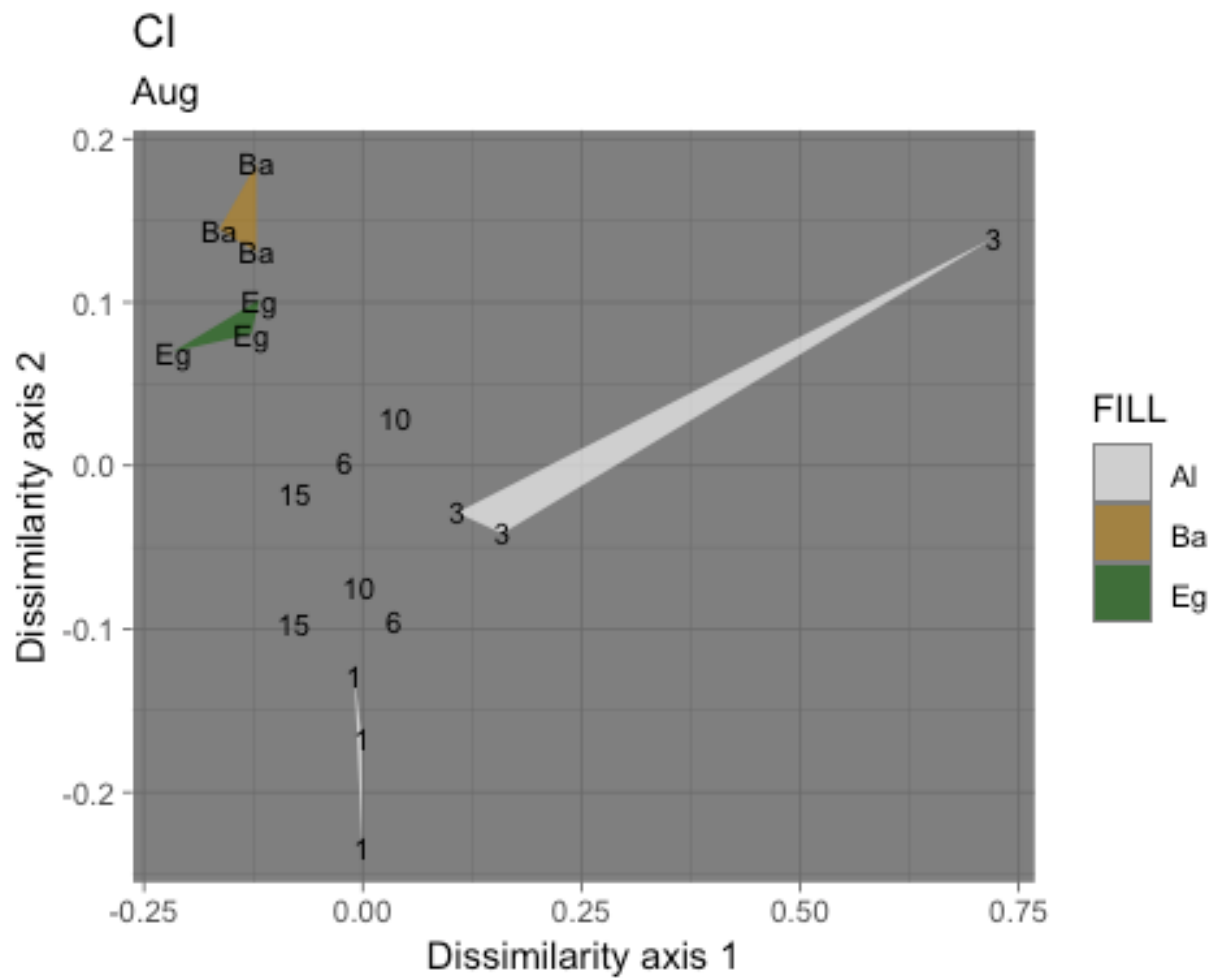

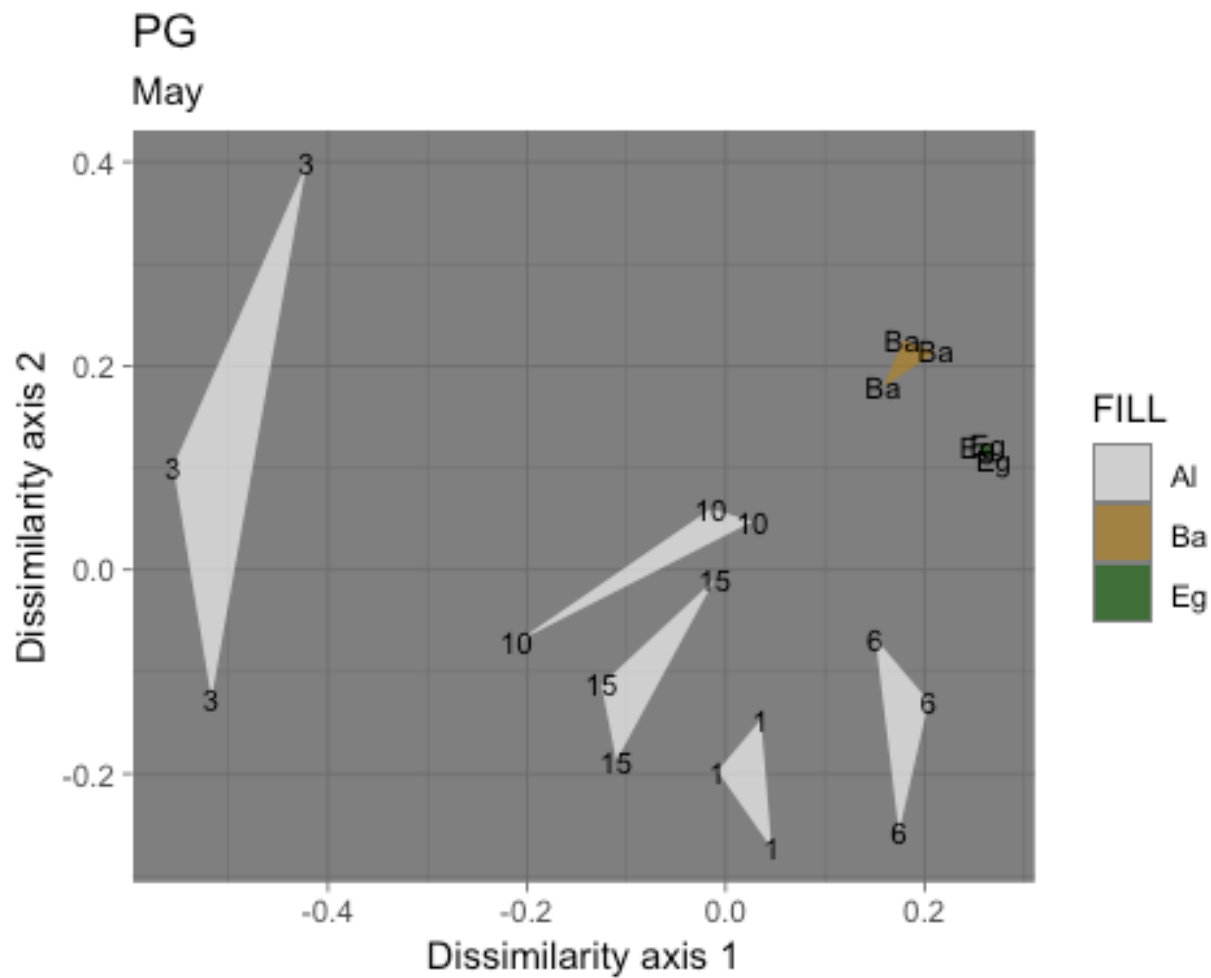

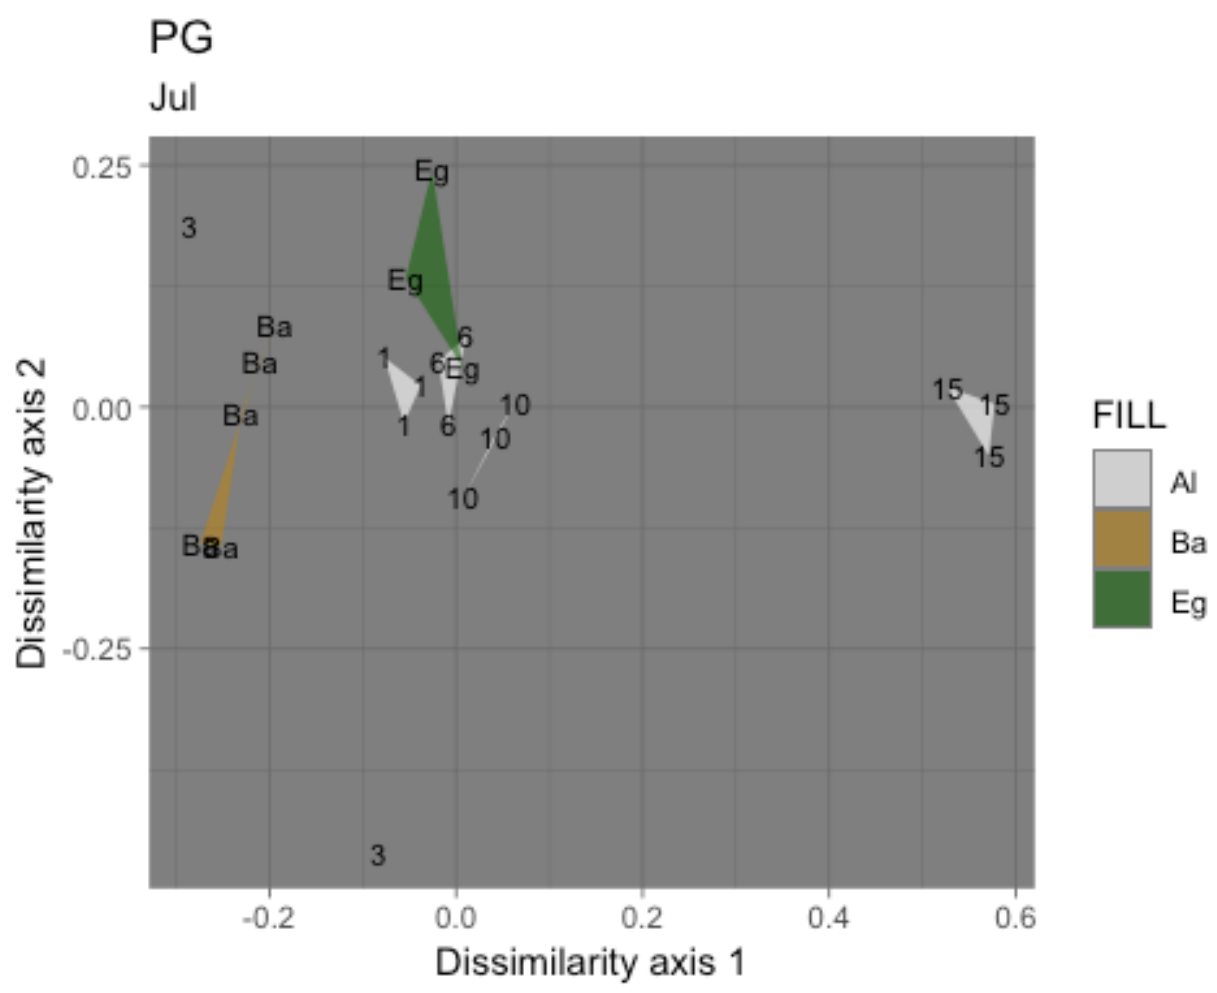

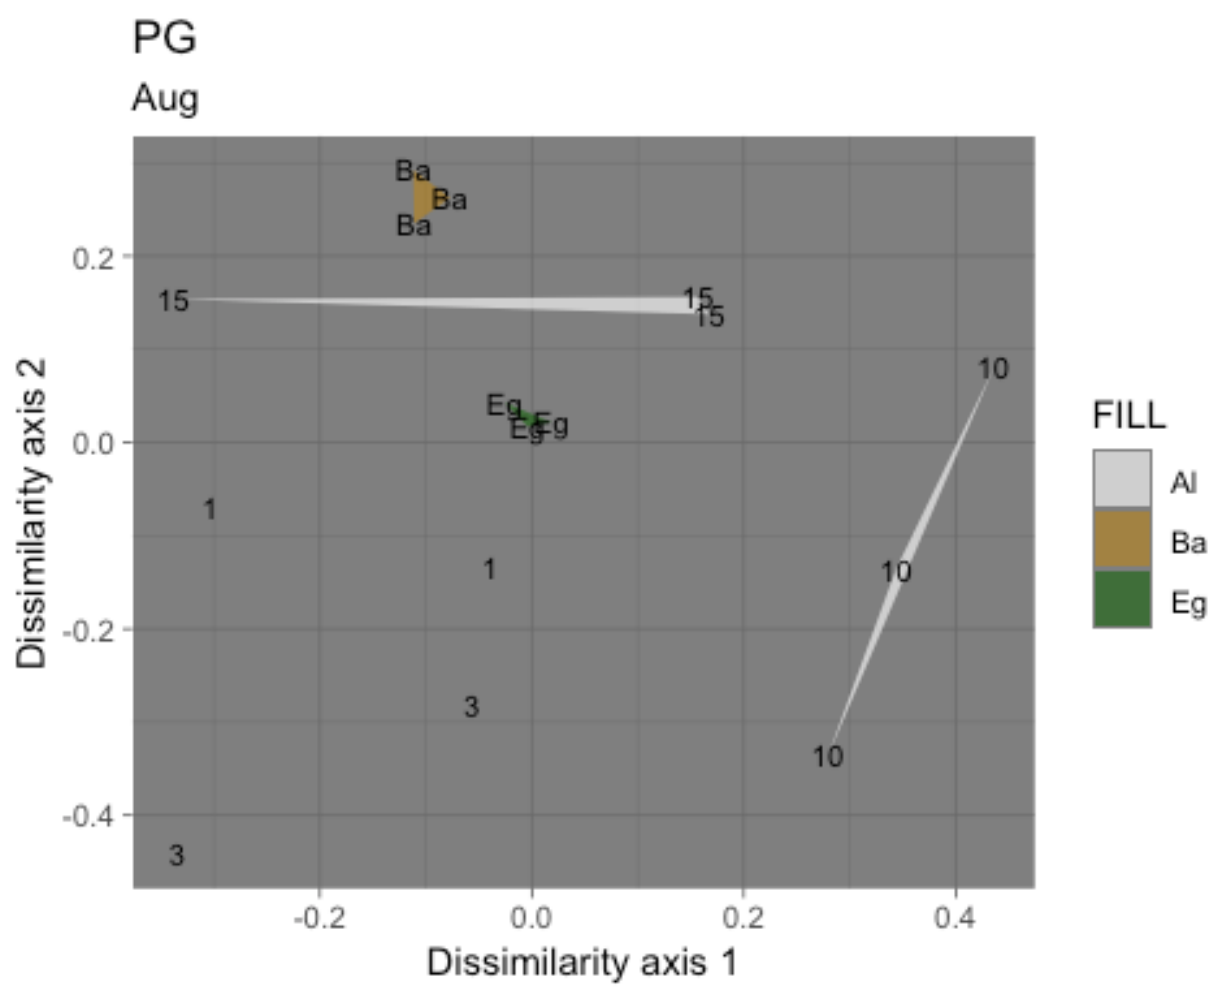

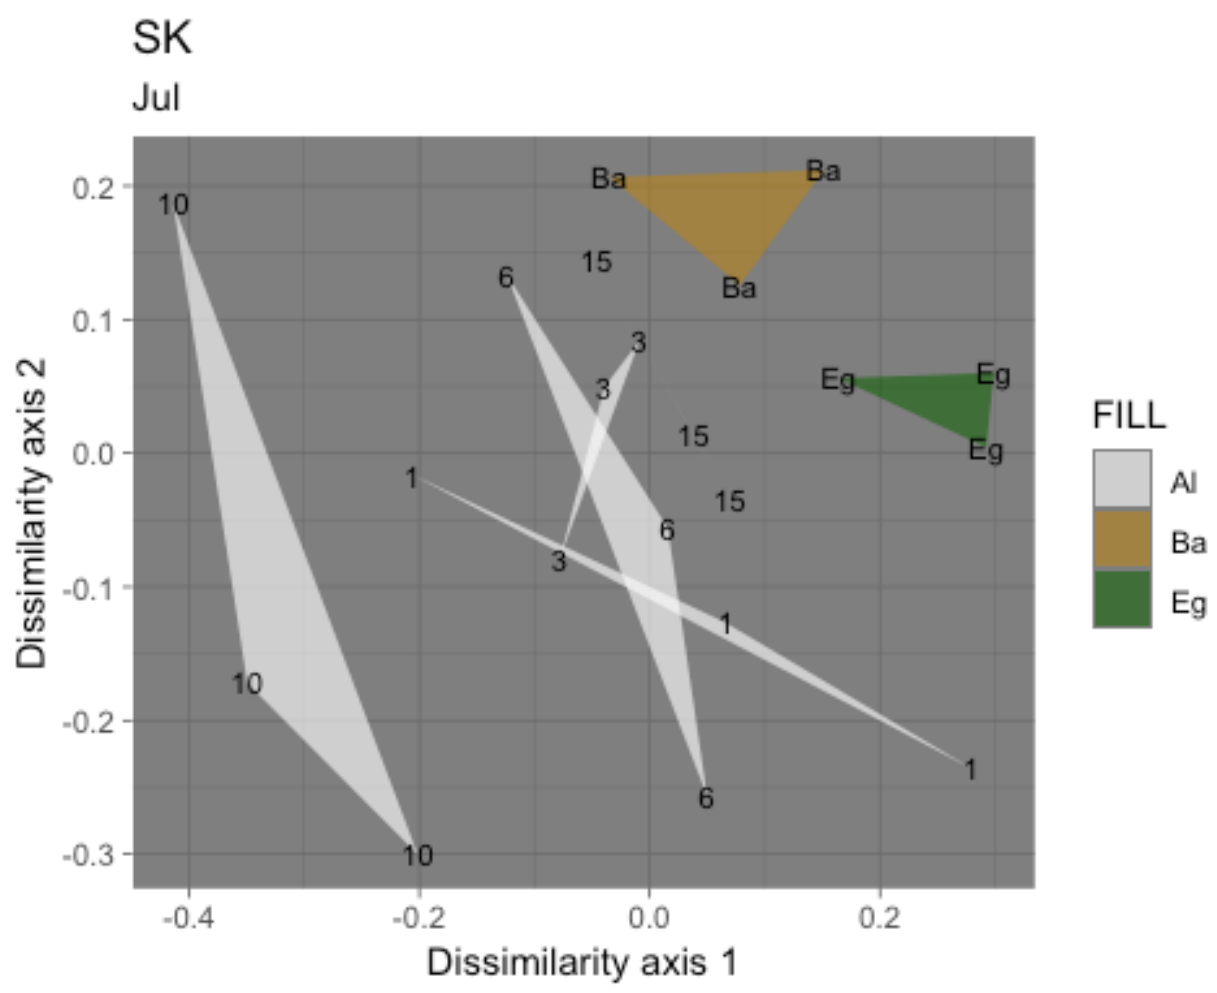

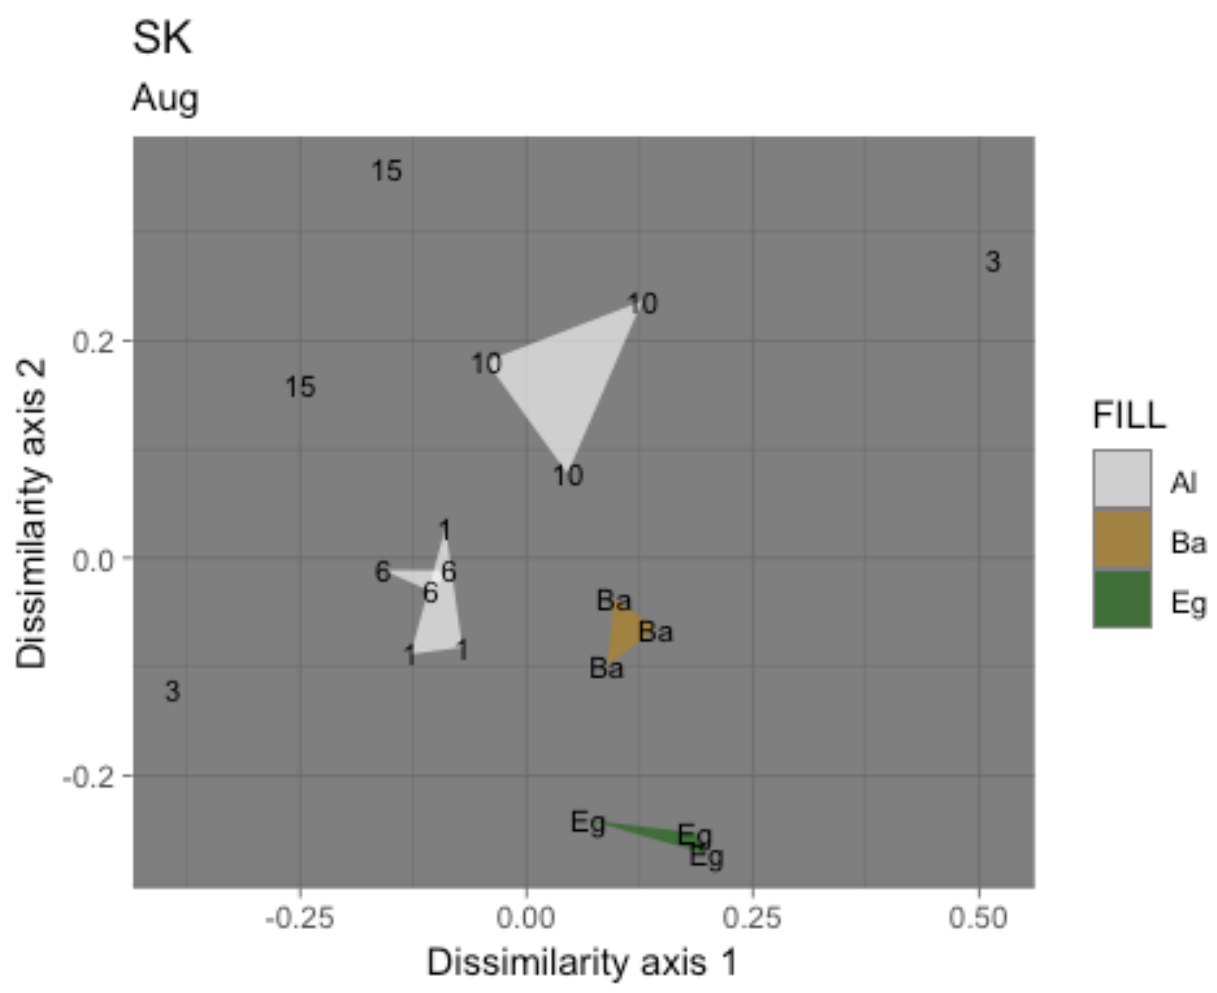

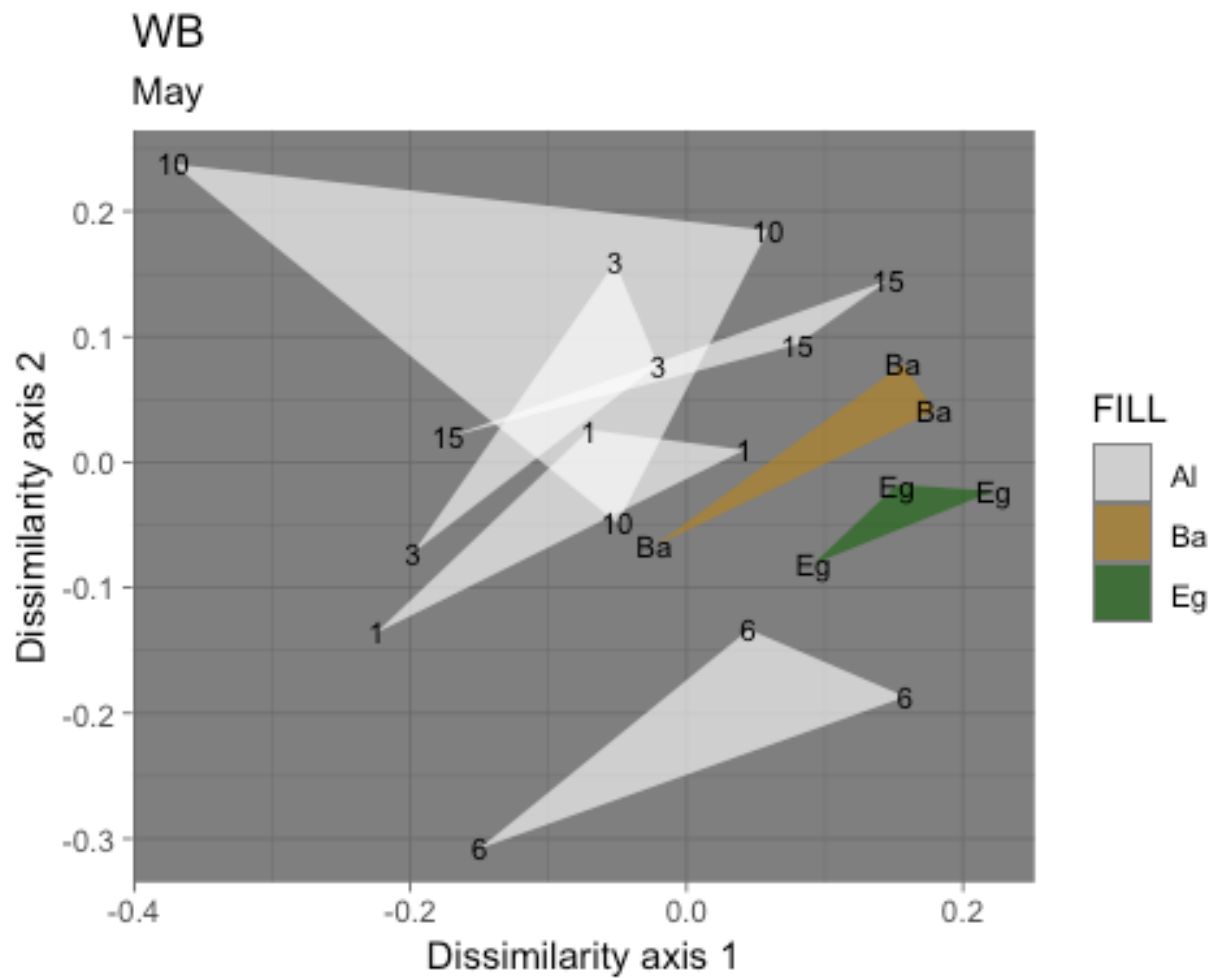

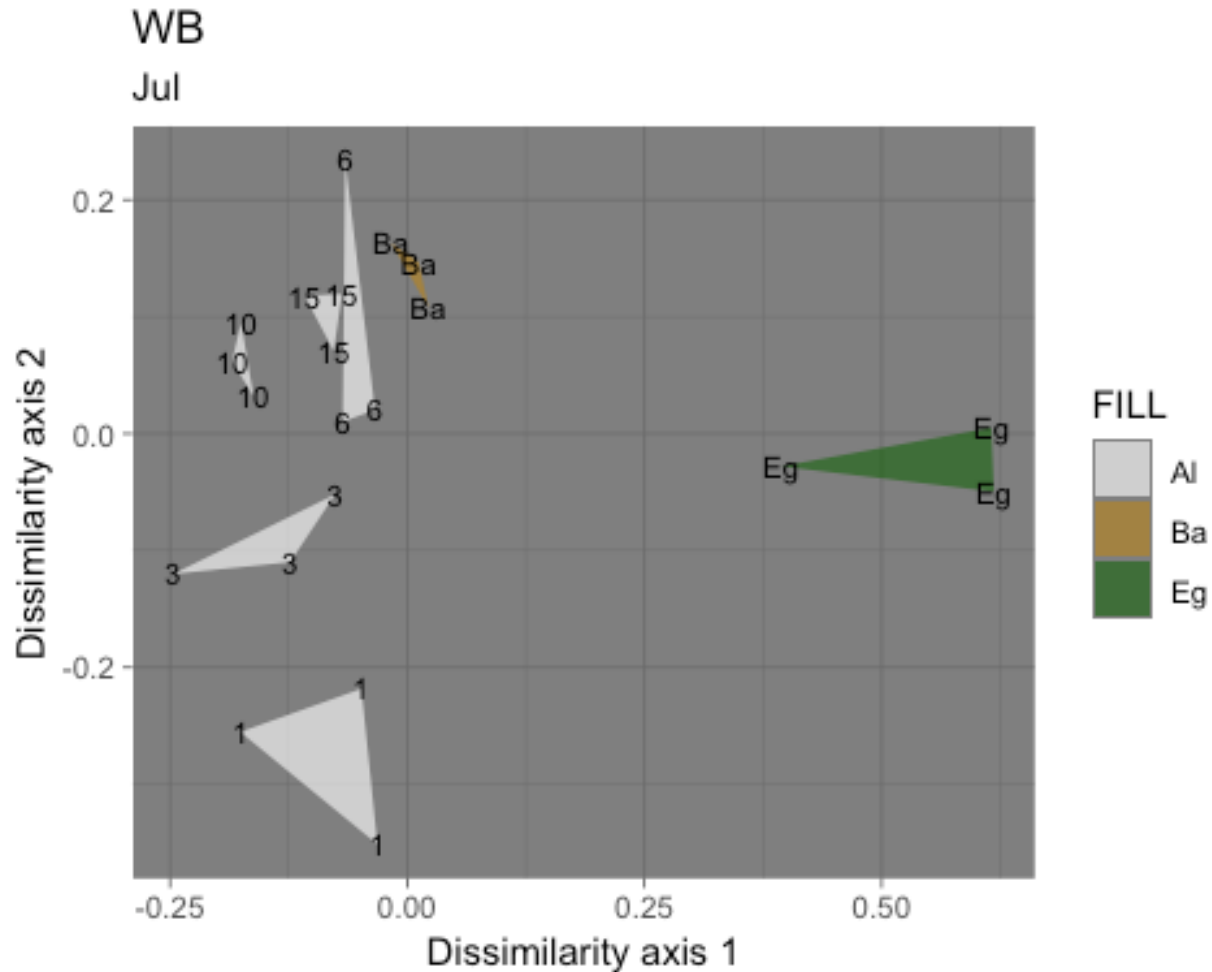

441

442 *Figure S7: Ordination plots of samples along all ten fully-sampled transects from bare to*  
443 *eelgrass positions. Technical replicates of each biological sample are grouped as triangles.*

444 *White alongshore transect samples are labeled with distance from eelgrass in meters; the single*  
445 *within-bed sample is green (labeled Eg) and the bare sample is brown (Ba).*

## 446 **References**

447 Amelia Kolb Gabriela Hannach., Swanson L. 2016. *Marine phytoplankton monitoring program*  
448 *sampling and analysis plan*. Seattle, WA: King County Department of Natural Resources; Parks.



- 449 Callahan BJ., McMurdie PJ., Rosen MJ., Han AW., Johnson AJA., Holmes SP. 2016. DADA2:  
450 High-resolution sample inference from illumina amplicon data. *Nature methods* 13:581.
- 451 Camacho C., Coulouris G., Avagyan V., Ma N., Papadopoulos J., Bealer K., Madden TL. 2009.  
452 BLAST+: Architecture and applications. *BMC Bioinformatics* 10:421.
- 453 Duffy JE. 2006. Biodiversity and the functioning of seagrass ecosystems. *Marine Ecology*  
454 *Progress Series* 311:233–250.
- 455 Forrest BM., Keeley NB., Hopkins GA., Webb SC., Clement DM. 2009. Bivalve aquaculture in  
456 estuaries: Review and synthesis of oyster cultivation effects. *Aquaculture* 298:1–15.
- 457 Fourqurean JW., Duarte CM., Kennedy H., Marbà N., Holmer M., Mateo MA., Apostolaki ET.,  
458 Kendrick GA., Krause-Jensen D., McGlathery KJ., others. 2012. Seagrass ecosystems as a  
459 globally significant carbon stock. *Nature geoscience* 5:505.
- 460 Gallego R.
- 461 Gibson J., Shokralla S., Porter TM., King I., Konynenburg S van., Janzen DH., Hallwachs W.,  
462 Hajibabaei M. 2014. Simultaneous assessment of the macrobiome and microbiome in a bulk  
463 sample of tropical arthropods through dna metasystematics. *Proceedings of the National*  
464 *Academy of Sciences* 111:8007–8012.
- 465 Gobler CJ., Doherty OM., Hattenrath-Lehmann TK., Griffith AW., Kang Y., Litaker RW. 2017.  
466 Ocean warming since 1982 has expanded the niche of toxic algal blooms in the north atlantic and  
467 north pacific oceans. *Proceedings of the National Academy of Sciences* 114:4975–4980.

- 468 Groner ML., Burge CA., Cox R., Rivlin ND., Turner M., Van Alstyne KL., Wyllie-Echeverria  
469 S., Bucci J., Staudigel P., Friedman CS. 2018. Oysters and eelgrass: Potential partners in a high  
470 pCO<sub>2</sub> ocean. *Ecology* 99:1802–1814.
- 471 Gross EM. 2003. Allelopathy of aquatic autotrophs. *Critical reviews in plant sciences* 22:313–  
472 339.
- 473 Harrison PG., Durance C. 1985. Reductions in photosynthetic carbon uptake in epiphytic  
474 diatoms by water-soluble extracts of leaves of *Zostera marina*. *Marine Biology* 90:117–119.
- 475 Heck Jr K., Hays G., Orth RJ. 2003. Critical evaluation of the nursery role hypothesis for  
476 seagrass meadows. *Marine Ecology Progress Series* 253:123–136.
- 477 Hosack GR., Dumbauld BR., Ruesink JL., Armstrong DA. 2006. Habitat associations of  
478 estuarine species: Comparisons of intertidal mudflat, seagrass (*Zostera marina*), and oyster  
479 (*Crassostrea gigas*) habitats. *Estuaries and Coasts* 29:1150–1160.
- 480 Huson DH., Beier S., Flade I., Górska A., El-Hadidi M., Mitra S., Ruscheweyh H-J., Tappu R.  
481 2016. MEGAN community edition-interactive exploration and analysis of large-scale  
482 microbiome sequencing data. *PLoS computational biology* 12:e1004957.
- 483 Inaba N., Trainer VL., Onishi Y., Ishii K-I., Wyllie-Echeverria S., Imai I. 2017. Algicidal and  
484 growth-inhibiting bacteria associated with seagrass and macroalgae beds in Puget Sound, WA, USA.  
485 *Harmful algae* 62:136–147.
- 486 IOC Harmful Algal Bloom Programme and the World Register of Marine Species. Taxonomic  
487 reference list of harmful micro algae.

- 488 Jones CG., Lawton JH., Shachak M. 1994. Organisms as ecosystem engineers. In: *Ecosystem*  
489 *management*. Springer, 130–147.
- 490 Kelly RP., Gallego R., Jacobs-Palmer E. 2018. The effect of tides on nearshore environmental  
491 dna. *PeerJ* 6:e4521.
- 492 Lahoz-Monfort JJ., Guillera-Aroita G., Tingley R. 2015. Statistical approaches to account for  
493 false positive errors in environmental dna samples. *Molecular Ecology Resources*.
- 494 Lamb JB., Water JA van de., Bourne DG., Altier C., Hein MY., Fiorenza EA., Abu N., Jompa J.,  
495 Harvell CD. 2017. Seagrass ecosystems reduce exposure to bacterial pathogens of humans,  
496 fishes, and invertebrates. *Science* 355:731–733.
- 497 Leray M., Yang JY., Meyer CP., Mills SC., Agudelo N., Ranwez V., Boehm JT., Machida RJ.  
498 2013. A new versatile primer set targeting a short fragment of the mitochondrial coi region for  
499 metabarcoding metazoan diversity: Application for characterizing coral reef fish gut contents.  
500 *Frontiers in zoology* 10:34.
- 501 Leray M., Knowlton N. 2015. DNA barcoding and metabarcoding of standardized samples  
502 reveal patterns of marine benthic diversity. *Proceedings of the National Academy of Sciences*  
503 112:2076–2081.
- 504 Li W., Cowley A., Uludag M., Gur T., McWilliam H., Squizzato S., Park YM., Buso N., Lopez  
505 R. 2015. The embl-ebi bioinformatics web and programmatic tools framework. *Nucleic acids*  
506 *research* 43:W580–W584.
- 507 Martin M. 2011. Cutadapt removes adapter sequences from high-throughput sequencing reads.  
508 *EMBnet journal* 17:pp–10.

- 509 Moore SK., Mantua NJ., Hickey BM., Trainer VL. 2009. Recent trends in paralytic shellfish  
510 toxins in puget sound, relationships to climate, and capacity for prediction of toxic events.  
511 *Harmful Algae* 8:463–477.
- 512 National Marine Fisheries Service West Coast Region. 2017. *WA eelgrass and shellfish*  
513 *aquaculture workshop report*. Seattle, WA.
- 514 NOAA Fisheries. 2014. *California eelgrass mitigation policy and implementing guidelines*. West  
515 Coast Region.
- 516 NOAA Fisheries. Habitat areas of particular concern.
- 517 Nordlund LM., Koch EW., Barbier EB., Creed JC. 2016. Seagrass ecosystem services and their  
518 variability across genera and geographical regions. *PLoS One* 11:e0163091.
- 519 O’Donnell JL., Kelly RP., Lowell NC., Port JA. 2016. Indexed pcr primers induce template-  
520 specific bias in large-scale dna sequencing studies. *PloS one* 11:e0148698.
- 521 Oksanen J., Blanchet FG., Kindt R., Legendre P., Minchin PR., O’hara R., Simpson GL.,  
522 Solymos P., Stevens MHH., Wagner H., others. 2013. Package “vegan”. *Community ecology*  
523 *package, version 2*.
- 524 Orth RJ., Carruthers TJ., Dennison WC., Duarte CM., Fourqurean JW., Heck KL., Hughes AR.,  
525 Kendrick GA., Kenworthy WJ., Olyarnik S., others. 2006. A global crisis for seagrass  
526 ecosystems. *Bioscience* 56:987–996.
- 527 Port JA., O’Donnell JL., Romero-Maraccini OC., Leary PR., Litvin SY., Nickols KJ., Yamahara  
528 KM., Kelly RP. 2016. Assessing vertebrate biodiversity in a kelp forest ecosystem using  
529 environmental dna. *Molecular ecology* 25:527–541.

- 530 Potouroglou M., Bull JC., Krauss KW., Kennedy HA., Fusi M., Daffonchio D., Mangora MM.,  
531 Githaiga MN., Diele K., Huxham M. 2017. Measuring the role of seagrasses in regulating  
532 sediment surface elevation. *Scientific reports* 7:11917.
- 533 Puget Sound Partnership. Vital sign: Eelgrass.
- 534 R Core Team. 2016. *R: A language and environment for statistical computing*. Vienna, Austria:  
535 R Foundation for Statistical Computing.
- 536 Renshaw MA., Olds BP., Jerde CL., McVeigh MM., Lodge DM. 2015. The room temperature  
537 preservation of filtered environmental dna samples and assimilation into a phenol–chloroform–  
538 isoamyl alcohol dna extraction. *Molecular ecology resources* 15:168–176.
- 539 Royle JA., Link WA. 2006. Generalized site occupancy models allowing for false positive and  
540 false negative errors. *Ecology* 87:835–841.
- 541 Schnell IB., Bohmann K., Gilbert MTP. 2015. Tag jumps illuminated–reducing sequence-to-  
542 sample misidentifications in metabarcoding studies. *Molecular Ecology Resources*.
- 543 Scrucca L., Fop M., Murphy TB., Raftery AE. 2016. Mclust 5: Clustering, classification and  
544 density estimation using gaussian finite mixture models. *The R journal* 8:289.
- 545 Shelton AO., Francis TB., Feist BE., Williams GD., Lindquist A., Levin PS. 2017. Forty years of  
546 seagrass population stability and resilience in an urbanizing estuary. *Journal of Ecology*  
547 105:458–470.
- 548 Short F., Carruthers T., Dennison W., Waycott M. 2007. Global seagrass distribution and  
549 diversity: A bioregional model. *Journal of Experimental Marine Biology and Ecology* 350:3–20.

550 Team RC., Worldwide C. 2015. The r stats package. *R Foundation for Statistical Computing:*  
551 *Vienna, Austria.*

552 Trainer VL., Eberhart B-TL., Wekell JC., Adams NG., Hanson L., Cox F., Dowell J. 2003.  
553 Paralytic shellfish toxins in puget sound, washington state. *Journal of Shellfish Research*  
554 22:213–223.

555 Trainer V., Moore L., Bill B., Adams N., Harrington N., Borchert J., Silva D da., Eberhart B-T.  
556 2013. Diarrhetic shellfish toxins and other lipophilic toxins of human health concern in  
557 washington state. *Marine Drugs* 11:1815–1835.

558 Tubaro A., Dell’Ovo V., Sosa S., Florio C. 2010. Yessotoxins: A toxicological overview.  
559 *Toxicon* 56:163–172.

560 Vera Trainer BB Teri King. 2016. *Soundtoxins manual*. Seattle, WA: NOAA/NMFS/NWFSC  
561 Marine Biotoxins Program for Washington Sea Grant.

562 Washinton State Department of Ecology. 2013. *Fish consumption rates. Technical support*  
563 *document: A review of data and information about fish consumption in washington.* Toxics  
564 Cleanup Program, Olympia, WA: Department of Ecology, State of Washington.

565 Wiese M., D’agostino PM., Mihali TK., Moffitt MC., Neilan BA. 2010. Neurotoxic alkaloids:  
566 Saxitoxin and its analogs. *Marine drugs* 8:2185–2211.
